1 **Accounting for 16S rRNA copy number prediction uncertainty and its implications in**  
2 **bacterial diversity analyses**

3

4 Yingnan Gao<sup>1</sup>, yg5ap@virginia.edu

5 Martin Wu<sup>1\*</sup>, mw4yv@virginia.edu

6 <sup>1</sup>Department of Biology, University of Virginia, 485 McCormick Road, Charlottesville, VA,

7 22904, USA

8 \*Corresponding author

9

## 10 **Abstract**

11 16S rRNA gene copy number (16S GCN) varies among bacterial species and this variation  
12 introduces potential biases to microbial diversity analyses using 16S rRNA read counts. To  
13 correct the biases, methods have been developed to predict 16S GCN. A recent study suggests  
14 that the prediction uncertainty can be so great that copy number correction is not justified in  
15 practice. Here we develop RasperGade16S, a novel method and software to better model and  
16 capture the inherent uncertainty in 16S rRNA GCN prediction. RasperGade16S implements a  
17 maximum likelihood framework of pulsed evolution model and explicitly accounts for  
18 intraspecific GCN variation and heterogeneous GCN evolution rates among species. Using cross  
19 validation, we show that our method provides robust confidence estimates for the GCN  
20 predictions and outperforms other methods in both precision and recall. We have predicted GCN  
21 for 592605 OTUs in the SILVA database and tested 113842 bacterial communities that represent  
22 an exhaustive and diverse list of engineered and natural environments. We found that the  
23 prediction uncertainty is small enough for 99% of the communities that 16S GCN correction  
24 should improve their compositional and functional profiles estimated using 16S rRNA reads. On  
25 the other hand, we found that GCN variation has limited impacts on beta-diversity analyses such  
26 as PCoA, PERMANOVA and random forest test.

27

## 28 **Introduction**

29 The 16S ribosomal RNA (16S rRNA) gene is the gold standard for bacterial and archaeal  
30 diversity study and has been commonly used to estimate the composition of bacterial and  
31 archaeal communities through amplicon sequencing. Sequence reads are usually matched to  
32 reference databases like SILVA [1] and GreenGenes [2] to determine the presence of taxa and

33 their relative cell abundances. However, the 16S rRNA gene copy number (GCN) can vary from  
34 1 to more than 15 [3,4] and this large copy number variation introduces bias in the relative cell  
35 abundance estimated using the gene read counts (thereafter referred to as gene abundance) [5],  
36 and consequently it can skew the community profiles, diversity measures and lead to  
37 qualitatively incorrect interpretations [5–8]. As a result, it has been argued that 16S rRNA GCN  
38 variations should be taken into account in 16S rRNA gene-based analyses [5].

39  
40 The majority of bacteria species have not been cultured or sequenced and their 16S rRNA GCNs  
41 are unknown. Studies have shown that 16S rRNA GCN exhibits a strong phylogenetic signal  
42 [5,7], and therefore 16S rRNA GCN can be inferred from closely related reference bacteria.  
43 Based on this principle, software has been developed to predict the 16S rRNA GCN [5,7,9,10] in  
44 a process often referred to as hidden state prediction [11]. However, a recent study correctly  
45 points out that the accuracy of 16S rRNA GCN prediction deteriorates as the minimum  
46 phylogenetic distance between the query sequence and the reference sequences increases, and the  
47 prediction of 16S rRNA GCN is still an open question [12].

48  
49 The increasing error of 16S rRNA GCN prediction with increasing phylogenetic distance roots  
50 from the stochastic nature of trait evolution, which leads to inherent uncertainty in the predicted  
51 trait values. One way of reducing the inherent uncertainty is to improve taxon sampling in the  
52 reference phylogeny to reduce the query's phylogenetic distance to the reference [13]. Another  
53 way of addressing the inherent uncertainty is to model the uncertainty directly and have a  
54 confidence estimate. By doing so, we will be able to determine how confident we should be  
55 about a GCN prediction and make meaningful interpretations. Unfortunately, few 16S rRNA

56 GCN prediction tools provide a confidence estimation for the predicted 16S rRNA GCN, and  
57 uncertainty is mostly ignored when interpreting the results of downstream analyses [5,7,10]. For  
58 example, PICRUST2 predicts functional profiles of bacterial and archaeal communities from 16S  
59 rRNA sequence data. It predicts 16S rRNA GCN for each operational taxonomic unit (OTU) in  
60 the community and uses the predicted values (point estimates) to estimate “corrected” relative  
61 cell abundances and metagenomes, without accounting for the uncertainty of the predictions. As  
62 a result, the impact of uncertainty in 16S rRNA GCN prediction on bacterial diversity analyses  
63 remains unknown and needs to be investigated.

64

65 Several points need to be considered to properly model the prediction uncertainty. First, because  
66 the uncertainty roots from the stochastic nature of trait evolution, we need to develop a good  
67 model for 16S rRNA GCN evolution. Previously the evolution of the 16S rRNA GCN trait has  
68 been modeled as gradual evolution using the Brownian motion (BM) model [5,7,10]. However,  
69 alternative models exist and need to be considered [14–16]. For example, the Ornstein-  
70 Uhlenbeck model assumes a centralizing trend towards an optimum [14,15]. As 16S rRNA GCN  
71 has been linked to the ecological strategy of bacterial species [17,18] and bacteria diversify  
72 across all types of environments, a consistent trend in the evolution of 16S rRNA GCN is  
73 unlikely. Thus, a model without any trend like the BM model is preferred. Pulsed evolution (PE)  
74 is another model that assumes no trend in evolution. Unlike the BM model, where small trait  
75 changes accumulate over time, the PE model postulates that traits evolve by jumps, followed by  
76 periods of stasis [14,19]. Previous studies have showed that pulsed evolution is prevalent in the  
77 evolution of mammalian body size [14,20]. It has been shown that 16S rRNA GCN of *Bacillus*  
78 *subtilis* can jump from 1 to 6 in a matter of days by gene amplification [21]. On the other hand, it

79 is well known that the 16S rRNA GCN of some bacterial clades such as the Rickettsiales order, a  
80 diverse group of obligate intracellular bacteria, has only one copy of 16S rRNA in their genomes,  
81 demonstrating stasis [22,23]. To develop a proper model for 16S rRNA GCN evolution, the  
82 tempo and mode of evolution need to be examined.

83

84 Secondly, 16S rRNA GCN can vary within the same species [24–27], which introduces  
85 uncertainty to GCN prediction that needs to be accounted for. It has been shown that modeling  
86 the intraspecific variation is essential for the analysis of comparative trait data and failing to  
87 account for this variation can result in model misspecification [14]. Because conspecific strains  
88 are usually separated by zero branch length in the phylogeny of the 16S rRNA gene, the  
89 intraspecific variation can be modelled as time-independent variation, which can also account for  
90 measurement errors [20].

91

92 Thirdly, there is notable rate heterogeneity in 16S rRNA GCN evolution. For example, the  
93 obligately intracellular bacteria and free-living bacteria with streamlined genomes (e.g.,  
94 *Rickettsia* and *Pelagibacter*) have elevated molecular evolutionary rates [28,29] and therefore  
95 relatively long branches in the 16S rRNA gene phylogeny [30]. Nevertheless, they have only one  
96 copy of 16S rRNA in their genomes and the GCNs rarely change [23]. It is expected that the 16S  
97 rRNA GCN prediction for this group of bacteria should be accurate despite their large  
98 phylogenetic distances to the reference genomes. Such examples suggest that the rate  
99 heterogeneity of 16S rRNA GCN evolution should be systematically evaluated and modelled  
100 properly. However, no previous methods have evaluated and modeled such evolution rate  
101 heterogeneity, leading to potential model misspecification in 16S rRNA GCN predictions.

102

103 Here, we develop a novel tool *RasperGade16S* that employs a heterogeneous pulsed evolution  
104 model for 16S rRNA GCN prediction. Using simulation and cross-validation, we show that  
105 *RasperGade16S* outperforms other methods in terms of providing significantly improved  
106 confidence estimates. We show that even if we cannot eliminate the inherent uncertainty of 16S  
107 rRNA GCN prediction, having an accurate confidence estimate allows us to incorporate it in  
108 downstream analyses and therefore to make better inferences from the results with confidence  
109 intervals. We show that correcting 16S rRNA GCN improves the relative cell abundance  
110 estimates of the bacterial communities and is expected to be beneficial for more than 99% of  
111 113842 environmental samples we have analyzed. We also show that GCN correction is  
112 unnecessary for beta-diversity analyses because it has limited impact on the results.

113

## 114 **Methods**

### 115 *Preparing reference genomes and the 16S rRNA reference phylogeny*

116 We downloaded annotated RNA gene sequences from 21245 complete bacterial genomes in the  
117 NCBI RefSeq database (Release 205) on April 9, 2021. For each genome, we counted the  
118 number of genes whose products are annotated as 16S rRNA genes. For genomes with multiple  
119 copies of 16S rRNA gene, we aligned the 16S rRNA sequences using MAFFT [31] (with  
120 parameters: --maxiterate 1000 --globalpair) and picked the 16S rRNA gene sequence that has the  
121 highest average similarity (calculated as the proportion of identical bases in the alignment) to  
122 other 16S rRNA gene sequences in the genome as the representative sequence. To remove  
123 potential errors introduced by mis-assembled genomes [32], we removed genomes whose 16S  
124 rRNA GCN differs from their 5S rRNA GCN (counted using the same strategy as 16S rRNA

125 GCN) by greater than 2 copies, genomes whose 16S rRNA sequence contains ambiguous bases,  
126 or genomes on the list of withheld genomes in the curated ribosomal RNA operon copy number  
127 database rrnDB [3]. The 17 genomes in the rrnDB withheld list are rejected from rrnDB because  
128 their 16S rRNA genes are missing, the 16S rRNA GCNs are too high, or the genomes have  
129 inconsistent meta data (<https://rrndb.umms.med.umich.edu/withheld/>). We aligned the remaining  
130 representative 16S rRNA gene sequences using HMMER version 3.2 [33] (hmmalign with  
131 parameters: --trim --dna --mapali) with the hidden Markov model (HMM) built from the  
132 GreenGenes 13.8 16S rRNA gene alignment (hmmbuild with default parameters), and trimmed  
133 the alignment with a mask from the GreenGenes database [2]. The HMM, profile alignment and  
134 the alignment mask are included in the R package RasperGade16S. After collapsing identical  
135 16S rRNA alignments, 6408 representative sequences remained. They serve as the reference  
136 sequences and their taxonomies of are summarized in Table S1. We built a reference tree from  
137 the trimmed alignment using RAxML version 8.2 [34] with options -f d -m GTRGAMMA. We  
138 used the *Deinococcus-Thermus* group to root this reference phylogeny. To examine the effect of  
139 sequence alignment on model fitting, we also used the 16S rRNA HMM profile from the  
140 software Barrnap [35] to align the 16S rRNA genes (hmmalign with default parameters). We  
141 trimmed the alignment using a consensus posterior probability threshold of 0.95 (esl-alimask  
142 with parameters: -p --ppcons 0.95) and made a 16S rRNA phylogeny as described above.

143

#### 144 *Evaluating time-independent variation in 16S rRNA GCN*

145 To evaluate the extent of 16S rRNA GCN intraspecific variation, we compared GCN between  
146 5437 pairs of genomes with identical 16S rRNA gene alignments. To formally test whether  
147 accounting for time-independent variation is necessary, we modeled time-independent variation

148 as a normal white noise, and fitted the Brownian motion (BM) model to the evolution of 16S  
149 rRNA GCN in the 6408 reference genomes, with and without time-independent variation. We  
150 then calculated the likelihood and chose the best model using the Akaike Information Criterion  
151 (AIC).

152

### 153 *Evaluating the rate heterogeneity of 16S rRNA GCN evolution*

154 To estimate the degree of rate heterogeneity in 16S rRNA GCN evolution, we calculated the  
155 local average rate of evolution for each genus that contains at least 10 genomes in the reference  
156 phylogeny and examined the distribution of the average rates among genera. The average rate of  
157 a genus is calculated as the variance of phylogenetically independent contrasts (PICs) [36] of  
158 GCN within the genus.

159

### 160 *Modeling 16S rRNA GCN evolution with homogeneous and heterogeneous pulsed evolution*

#### 161 *models*

162 Using the R package *RasperGade* [37], we fitted one PE model to the entire reference phylogeny  
163 and calculated the likelihood of this homogeneous PE model. An analysis of the variance of the  
164 PICs associated with each genus indicated that there is a slowly-evolving group and a regularly-  
165 evolving group, with the average rate of the slowly-evolving group estimated to be at least 100-  
166 fold lower than that of the regularly-evolving group (Figure S1). To model the rate heterogeneity,  
167 we created two PE models:  $PE_{regular}$  for the regularly-evolving group and  $PE_{slow}$  for the slowly-  
168 evolving group. We then use a two-step iterative binning procedure to estimate the parameters of  
169  $PE_{regular}$  and  $PE_{slow}$  (i.e., jump size and frequency). The  $PE_{regular}$  model was initiated to take the  
170 parameter values of the homogeneous PE model.  $PE_{slow}$  was initiated to have a jump size equal



171 to that of  $PE_{regular}$  but a jump frequency 100-fold lower. In our first round of binning, from the  
172 root to the tip of the reference phylogeny, we classified each node into the regularly- or slowly-  
173 evolving group by testing which model ( $PE_{regular}$  or  $PE_{slow}$ ) provided a better fit. We merged  
174 neighboring nodes belonging to the same group into one neighborhood and flipped neighborhood  
175 assignment if the flip resulted in an improved overall AIC value. After the first round of binning,  
176 we updated  $PE_{regular}$  and  $PE_{slow}$  by fitting  $PE_{regular}$  to nodes that were classified as regularly-  
177 evolving and  $PE_{slow}$  to slowly-evolving nodes. We used the updated models to perform a second  
178 round of binning to assign each node in the phylogeny to a group. Finally, we calculated  $r$ , the  
179 rate of evolution in each group, as the process variance per unit branch length defined in a  
180 previous study [14]. We then rescaled the reference tree by multiplying the branches in the  
181 slowly-evolving group by the ratio  $r_{slow}/r_{regular}$ . To accommodate time-independent variation in  
182 the tip trait values, we calculated a branch length over which the process variance of the fitted  
183 pulsed evolution model is equal to the model's time-independent variation, and added this branch  
184 length to each tip branch. We compared the homogeneous and heterogeneous PE models by AIC.  
185

### 186 *Predicting 16S rRNA GCN*

187 We used the R package *RasperGade16S* to predict 16S rRNA GCN using the heterogeneous  
188 pulsed evolution model. *RasperGade16S* first assigns the query sequence to either the regularly-  
189 evolving or the slowly-evolving group based on where it is inserted in the reference phylogeny.  
190 For a query sequence inserted into the slowly-evolving group, its insertion branch length is  
191 scaled by the ratio  $r_{slow}/r_{regular}$ . For a query sequence inserted into the regularly-evolving group, a  
192 small branch length is added to the insertion branch to represent the estimated time-independent  
193 variation. *RasperGade16S* then predicts the GCN of the query using the rescaled reference

194 phylogeny. Because 16S rRNA GCN is an integer trait, the continuous prediction from hidden  
195 state prediction is rounded and a confidence (probability) that the prediction is equal to the truth  
196 is estimated by integrating the predicted uncertainty distribution. We marked the 16S rRNA  
197 GCN prediction with a confidence smaller than 95% as unreliable, and otherwise as reliable. As  
198 a comparison, we also predicted GCN using PICRUST2, which employs multiple hidden state  
199 prediction methods in the R package *castor* [38] for 16S rRNA GCN predictions. We selected  
200 three methods by which confidence can be estimated: the phylogenetically independent contrast  
201 (pic) method, the maximum parsimony (mp) method, and the empirical probability (emp)  
202 method. Otherwise, we run PICRUST2 using default options and the unscaled reference  
203 phylogeny. For the pic method, the confidence measure is not provided by the hidden state  
204 prediction function of the *castor* package, and thus we used a customized R script to reroot the  
205 tree at the query sequence and estimated the confidence of the prediction.

206

207 We did not test the tools CopyRighter [7] and PAPRICA [9] directly in this study because 1)  
208 neither provides the option of using a user-supplied reference data, and 2) neither provides  
209 uncertainty estimates (i.e., confidence intervals) of its predictions, which is the primary focus of  
210 this study. However, CopyRighter employs the pic method and we expect its performance to be  
211 highly similar to PICRUST2 running the pic method. As PAPRICA [9] employs the subtree  
212 average method, a continuous analogue to the emp method, we expect that its performance will  
213 be highly similar to that of PICRUST2 running the emp method.

214

215 *Adjust NSTD and NSTI with rate heterogeneity*

216 The adjusted nearest-sequenced-taxon-distances (NSTDs) [12] is calculated using the rescaled  
217 reference tree. The adjusted nearest-sequenced-taxon-index (NSTI) [10] is calculated as the  
218 weighted average of adjusted NSTDs of the community members.

219

220 *Validating the quality of predicted 16S rRNA GCN and its confidence estimate*

221 We used cross-validations to evaluate the quality of 16S rRNA GCN prediction and its  
222 confidence estimate, and how they vary with NSTD. We randomly selected 2% of the tips in the  
223 reference phylogeny as the test set and filtered the remaining reference set by removing tips with  
224 a NSTD to any test sequence smaller than a threshold. We then predicted the 16S rRNA GCN for  
225 each tip in the test set using the filtered reference set. We conducted cross-validation within 9  
226 bins delineated by 10 NSTD thresholds: 0, 0.002, 0.005, 0.010, 0.022, 0.046, 0.100, 0.215, 0.464  
227 and 1.000 substitutions/site, and for each bin we repeated the cross-validation 50 times with non-  
228 overlapping test sets. We evaluated the quality of the 16S rRNA GCN prediction by the  
229 coefficient of determination ( $R^2$ ), the fraction of variance in the true copy numbers explained by  
230 the prediction. We evaluated the quality of confidence estimate by precision and recall. Precision  
231 is defined as the proportion of accurately predicted 16S rRNA GCN in predictions considered as  
232 reliable (with  $\geq 95\%$  confidence), and recall is defined as the proportion of reliable predictions in  
233 the accurately predicted 16S rRNA GCNs. We averaged the  $R^2$ , precision and recall for the 50  
234 cross-validations in each bin.

235

236 *Simulating 16S rRNA GCN variation under pulsed evolution model*

237 To evaluate the performance of different prediction methods when the trait evolves under the  
238 pulsed evolution model, we simulated the evolution of 16S rRNA GCN using the fitted  
239 heterogeneous pulsed evolution model. Specifically, we first simulated the number of jump  
240 events for each branch in the reference phylogeny based on the rate group that branch belongs to.  
241 Then we simulated the continuous trait change for each branch using the corresponding number  
242 of jump events. We added up the continuous trait change from the root to the tips to get the tip  
243 trait values and rounded them to the nearest integers. This set of simulated 16S rRNA GCN is  
244 referred to as ST1.

245

#### 246 *Simulating bacterial communities with 16S rRNA GCN variation*

247 To evaluate the effect of 16S rRNA GCN correction on bacterial diversity analyses, we  
248 simulated two sets of bacterial communities using the reference genomes: one set for relative cell  
249 abundance analyses (SC1) and the other set for beta-diversity analyses (SC2). We treated each  
250 reference genome as one OTU. For SC1, we simulated a total of 100 communities. For each  
251 simulated community, we randomly selected 2000 OTUs from the reference genomes, and  
252 assigned each OTU a cell abundance randomly drawn from a log-series species abundance  
253 distribution.

254

255 In SC2, we simulated communities in two environments to evaluate the effect of 16S rRNA  
256 GCN correction on beta diversity analyses. We simulated 10 communities per environmental  
257 type and 2000 OTUs per community. We controlled the community turnover rate by controlling  
258 the number of unique OTUs in each community. For example, at a turnover rate of 10%, a  
259 community would have 200 unique OTUs and 1800 core OTUs that are shared among all

260 communities. We varied the turnover rate from 10% to 90% at 10% intervals. To control for the  
261 effect size of environmental type, we assigned 5 (0.25%), 20 (1%) or 100 (5%) signature OTUs  
262 to each environmental type. These signature OTUs were shared between the two environmental  
263 types but were twice more likely to be placed in top ranks of the log-series distribution (i.e., to be  
264 more abundant) than the non-signature OTUs in their corresponding environment. The 16S  
265 rRNA GCN of each OTU was assigned randomly from the reference genomes' GCN. We  
266 simulated 50 batches of communities for each combination of turnover rate and signature OTU  
267 number, resulting in 27000 simulated communities in SC2.

268

### 269 *Evaluating the effect of 16S rRNA GCN correction on relative cell abundance estimation*

270 We evaluated the effect of 16S rRNA GCN correction on the simulated bacterial communities  
271 (SC1). To estimate the confidence interval (CI) of the corrected relative cell abundance of each  
272 OTU in a community, we randomly drew 1000 sets of 16S rRNA GCNs from their predicted  
273 uncertainty distribution. For each set of 16S rRNA GCNs, we divided the gene read count of  
274 OTUs by their corresponding 16S rRNA GCNs to get the corrected cell counts. The median of  
275 the corrected cell count for each OTU in the 1000 sets is used as the point estimate of the  
276 corrected cell count, and the OTU's relative cell abundance is calculated by normalizing the  
277 corrected cell count with the sum of corrected cell counts of all OTUs in the community. The 95%  
278 CI for each OTU's relative cell abundance is determined using the 2.5% and 97.5% quantiles of  
279 the 1000 sets of corrected relative cell abundances. The OTU with the highest corrected relative  
280 cell abundance is considered the most abundant taxon. The support value for the most abundant  
281 OTU is calculated as the empirical probability that the OTU has the highest cell abundance in the  
282 1000 sets of corrected cell abundances. We calculated the coverage probability of the CI as the

283 empirical frequency that the relative gene abundance or true relative cell abundance is covered  
284 by the estimated CI. We evaluated the effect of 16S rRNA GCN correction on relative cell  
285 abundance estimation at different NSTD thresholds.

286

### 287 *Evaluating the effect of 16S rRNA GCN correction on beta-diversity analyses*

288 We used the Bray-Curtis dissimilarity and Aitchison distance for any beta-diversity analysis that  
289 requires a dissimilarity or distance matrix and evaluated the effect of 16S rRNA GCN correction  
290 on the simulated bacterial communities (SC2). To correct for 16S rRNA GCN variation in beta-  
291 diversity analyses, we divided the gene abundance of each OTU by its predicted 16S rRNA GCN  
292 and calculated the corrected relative cell abundance table and the corresponding  
293 dissimilarity/distance matrix. We used the corrected cell abundance table to generate the  
294 principal coordinates analysis (PCoA) plot and to conduct the permutational multivariate  
295 analysis of variance (PERMANOVA) and the random forest test with the R package *vegan* and  
296 *randomForest*, respectively.

297

### 298 *Predicting 16S rRNA GCN for SILVA OTUs*

299 We downloaded 592605 full-length representative bacterial 16S rRNA sequences of non-  
300 redundant OTUs at 99% similarity (OTU99) in the SILVA release 132 [1]. We aligned and  
301 trimmed the sequences using the method described above. We then inserted the OTUs into the  
302 reference phylogeny using the evolutionary placement algorithm (EPA-ng) [39] with the model  
303 parameters estimated by RAxML when building the reference phylogeny. We limited the  
304 maximum number of placements per SILVA representative sequence to 1. We predicted the 16S

305 rRNA GCN for each SILVA OTU99 as described above using the heterogeneous pulsed  
306 evolution model and calculated adjusted NSTDs.

307

### 308 *Evaluating the effect of GCN correction in HMP1 and EMP dataset*

309 To check the effect of 16S rRNA GCN correction in empirical data, we analyzed the 16S rRNA  
310 V1-V3 amplicon sequence data of the first phase of Human Microbiome Project (HMP1) [40]  
311 and the sequence data processed by Deblur [41] in the first release of the Earth Microbiome  
312 Project (EMP) [42]. The 16S rRNA GCN for each OTU in the HMP1 and EMP datasets was  
313 predicted using *RasperGade16S*. We picked 2560 samples in the HMP1 dataset with complete  
314 metadata and used the 2000-sample subset of EMP, and determined the adjusted NSTI and  
315 relative cell abundance in each community as described above. For beta-diversity, we randomly  
316 picked 100 representative samples from each of the 5 body sites in the HMP1 dataset and  
317 analyzed their beta-diversity as described above. For the EMP dataset, we analyzed the beta-  
318 diversity within each level-2 EMP ontology (EMPO) category (around 400 to 600 samples per  
319 category).

320

### 321 *Examining the adjusted NSTI of empirical bacterial communities*

322 To check the predictability of 16S rRNA GCN in empirical data, we examined bacterial  
323 communities surveyed by 16S rRNA amplicon sequencing in the MGnify resource platform [43]  
324 that were processed with the latest two pipelines (4.1 and 5.0). The MGnify resource platform  
325 uses the SILVA database release 132 [1] for OTU-picking in their latest pipelines, and therefore  
326 predicted GCNs for SILVA OTUs can be used directly. We filtered the surveyed communities  
327 from the MGnify platform so that only communities with greater than 80% of their gene reads

328 mapped to the SILVA reference at a similarity of 97% or greater were included. This filtering  
329 yielded 113842 bacterial communities representing a broad range of environment types. We  
330 calculated the adjusted NSTI for each community and examined the adjusted NSTI distribution  
331 in various environmental types.

332

## 333 **Results**

### 334 *Time-independent variation is present in 16S rRNA GCN evolution*

335 To evaluate the extent of intraspecific variation in 16S rRNA GCN, we examined 5437 pairs of  
336 genomes with identical 16S rRNA gene alignments. The 16S rRNA GCN differs in 607 (11%) of  
337 them, suggesting the presence of significant intraspecific variation or time-independent variation.  
338 Using AIC, we found that incorporating time-independent variation with the BM model greatly  
339 improves the model fit (Table 1), indicating the necessity to take time-independent variation into  
340 account in 16S rRNA GCN prediction. In addition, we observed that the rate of evolution in the  
341 fitted BM model is inflated by 1670 folds when time-independent variation is not included in the  
342 model. Such inflation in the estimated rate of evolution will lead to overestimation of uncertainty  
343 in the 16S rRNA GCN prediction.

344

345 **Table 1. The AICs of Brownian motion model and pulsed evolution model.**

| Model               | BM    | BM (with time-independent variation) | PE (with time-independent variation) |
|---------------------|-------|--------------------------------------|--------------------------------------|
| Homogenous model    | 34338 | 18028                                | -7925                                |
| Heterogeneous model | NA    | NA                                   | -15395                               |

346



347 *Pulsed evolution model explains the 16S rRNA GCN evolution better than the Brownian motion*  
348 *model*

349 When predicting traits using phylogenetic methods, the BM model is commonly assumed to be  
350 the model of evolution. We have shown that PE model is a better model for explaining the  
351 evolution of [14,20] bacterial genome size [37], prompting us to test whether pulsed evolution  
352 can be applied to explain 16S rRNA GCN evolution as well. Using the R package *RasperGade*  
353 that implements the maximum likelihood framework of pulsed evolution described by Landis  
354 and Schraiber [14], we fitted the PE model with time-independent variation to the same dataset.  
355 Table 1 shows that the PE model provides a significantly better fit than the BM model, indicating  
356 that 16S rRNA GCN prediction should assume the PE model instead of the BM model. Fitted  
357 model parameters are not sensitive to the HMM profiles used for aligning the 16S rRNA  
358 sequences (Table S2).

359

360 *Substantial rate heterogeneity exists in 16S rRNA GCN evolution*

361 To systematically examine the rate heterogeneity of 16S rRNA GCN evolution in the reference  
362 genomes, we first used the variance of PICs as an approximate estimate of the local evolution  
363 rate of 16S rRNA GCN. We found that the rate of evolution varies greatly among genera (Figure  
364 S1), but can be roughly divided into two groups with high and low rates of evolution. Therefore,  
365 we developed a heterogeneous pulsed evolution model where all jumps are the same size but the  
366 frequency of jumps varies between two groups to accommodate the heterogeneity among  
367 different bacterial lineages. Using a likelihood framework and AIC, we classified 3049 and 3358  
368 nodes and their descending branches into slowly-evolving and regularly-evolving groups  
369 respectively (Figure S2). The frequency of jumps in the regularly-evolving group is 145 folds of

370 the frequency in the slowly-evolving group (Table S3). The heterogeneous PE model provides  
371 the best fit among all models tested (Table 1), indicating that a heterogeneous PE model should  
372 be assumed in predicting 16S rRNA GCN.

373

374 Apart from the rate of pulsed evolution, we also observed heterogeneity in time-independent  
375 variation: for the slowly-evolving group, the fitted model parameters indicate no time-  
376 independent variation, while for the regularly-evolving group, the magnitude of time-  
377 independent variation is approximately 40% of a jump in pulsed evolution (Table S3). The  
378 presence of time-independent variation caps the confidence of prediction in the regularly-  
379 evolving group at 85%, which can only be achieved when the query has identical 16S rRNA  
380 gene alignment to one of the reference genomes.

381

382 *The effect of NSTD on accuracy and uncertainty of 16S rRNA GCN predictions*

383 Because of the stochastic nature of evolution, the inherent uncertainty in hidden state prediction  
384 accumulates over time, and consequently the accuracy of the prediction decreases as the  
385 phylogenetic distance to the reference increases [12]. To get a better understanding of the  
386 relationships between NSTD and metrics that measure the accuracy and uncertainty of the  
387 prediction, we performed a cross-validation experiment using simulated datasets. We simulated  
388 the evolution of 16S rRNA GCN under the fitted heterogeneous pulsed evolution model along  
389 the reference phylogeny (ST1), and predicted the simulated GCN of the tips using different  
390 methods: the pulsed evolution model (PE), the BM model (pic), maximum parsimony (mp) and  
391 empirical probability (emp). As expected, we found that the true uncertainty of the prediction, as  
392 predicted by the pulsed evolution model under which the simulated GCN evolves, increases with

393 the NSTD. The true confidence of the prediction, calculated as  $1 - \text{uncertainty}$ , decreases with the  
394 NSTD (Figure 1A, purple line). The pic method predicts greatly inflated uncertainty (Figure 1A,  
395 red line), while the mp method predicts no uncertainty at all (Figure 1A, blue line). The emp  
396 method predicts intermediate uncertainty that is greater than the true uncertainty at small NSTDs,  
397 but smaller than the truth at large NSTDs (Figure 1A, green line). We used the coefficient of  
398 determination ( $R^2$ ) of the predicted trait values to the truth to evaluate the accuracy of the  
399 prediction. Figure 1B shows the PE method performs the best. It is followed by the mp and the  
400 pic method. The emp method performs the worst. As observed in previous research [12], the  
401 accuracy decreases as the NSTD increases (Figure 1B).

402

403 Because we will use the uncertainty measure to evaluate the reliability of the prediction, we  
404 tested whether the uncertainty predicted by the various methods we compared here captures the  
405 true reliability of the prediction. Specifically, we calculated the precision and recall of  
406 predictions with a confidence of 95% or greater to examine the recovery of highly reliable  
407 predictions. We define precision as the proportion of accurately predicted 16S rRNA GCN in  
408 predictions with  $\geq 95\%$  confidence, and recall as the proportion of predictions with  $\geq 95\%$   
409 confidence in the accurately predicted 16S rRNA GCNs. Ideally, the precision should be greater  
410 than 95% throughout the NSTD spectrum, while the recall should gradually drop as the NSTD  
411 and the uncertainty of prediction increase. We found that the PE method yields high recall at  
412 small NSTDs and it decreases as NSTD and uncertainty in the prediction increase (Figure 1C,  
413 purple line). In terms of precision, the PE method yields high precision throughout the spectrum  
414 of NSTD (Figure 1D, purple line). The pic method has the lowest recall rate at the smallest  
415 NSTD and no recovery beyond as it overestimates the uncertainty (Figure 1C and D, red lines).

416 On the contrary, the mp method yields the highest recall regardless of NSTD as it predicts no  
417 uncertainty at all (Figure 1C, blue line), but it suffers from lower precision than the PE method  
418 and the precision drops quickly as NSTD increases (Figure 1D, blue line). In essence, the  
419 uncertainty estimated using the pic method is so great that few predictions can be trusted. On the  
420 other hand, according to the mp method, there is no uncertainty in a prediction and every  
421 prediction is reliable. The emp method shows a similar trend in recall compared to the PE  
422 method, but suffers from lower precision than the PE method.

423

424 In summary, the uncertainty of 16S rRNA GCN prediction increases with the increase of NSTD,  
425 and as a result, the accuracy of prediction drops as the NSTD increases for all methods. The  
426 recall rate of highly reliable predictions also drops with the increasing NSTD and uncertainty,  
427 while the precision can remain high throughout the NSTD spectrum.

428

429 *RasperGade16S improves confidence estimate for 16S rRNA GCN prediction in empirical data*

430 Using 16S rRNA GCN from the 6408 complete genomes in the reference phylogeny for cross-  
431 validation, we compared the performance of various methods in accuracy and confidence  
432 estimates. In general, the trends of uncertainty, accuracy, precision and recall plotted against the  
433 NSTD (Figure 2) are very similar to those observed in the simulation study (Figure 1), indicating  
434 that *RasperGade16S* models the 16S rRNA GCN evolution reasonably well. As observed in the  
435 simulation, the pic and mp methods produce very large and zero uncertainty respectively (Figure  
436 2A), leading to both poor precision and recall rates (Figure 2C and 2D). The emp method  
437 performs the worst in terms of accuracy. The PE method produces the best overall precision,  
438 achieving an average precision rate of 0.96 throughout the NSTD spectrum. Overall, the PE

439 method provides one of the best accuracies and the best confidence estimate for 16S rRNA GCN  
440 prediction over the full spectrum of NSTD, and should be preferred when predicting 16S rRNA  
441 GCN.

442

443 As NSTD of the 16S rRNA gene also depends on the sequence alignment and how it is trimmed,  
444 it can vary from study to study using the same set of reference sequences. Therefore, to put  
445 NSTD values of this study in a taxonomic context, we calculated the NSTDs between taxa at  
446 different taxonomical levels. For example, at the species level, we calculated the NSTD of a  
447 species to another species within the same genus. We found that the median NSTD between  
448 congeneric species is around 0.01 substitutions/site and the maximum NSTD threshold (0.464  
449 substitutions/site) in our cross-validation experiment roughly correspond to a taxonomic distance  
450 somewhere between class and order (Figure S3).

451

#### 452 *Copy number correction improves relative cell abundance estimation*

453 Because 16S rRNA GCN variation biases gene abundances disproportionately among the  
454 community members, it distorts the relative cell abundance estimated from the gene abundance  
455 [5]. From theoretical calculations, in general, community members with lower relative cell  
456 abundances suffer from greater impacts by 16S rRNA GCN variation, while those with higher  
457 relative cell abundances appear to be less affected by it (Figure 3A). The impact of 16S rRNA  
458 GCN variation also depends on the deviation of a member's GCN from the average GCN of the  
459 community members, with larger deviations resulting in larger impacts (Figure 3A). When a  
460 member's 16S rRNA GCN is greater than the average GCN of the community, its relative  
461 abundance will be overestimated. On the other hand, when a member's 16S rRNA GCN is

462 smaller than the average GCN, its relative abundance will be underestimated. In simulated  
463 dataset SC1, we found that 16S rRNA GCN variation has a large detrimental effect on the  
464 estimated relative cell abundance (Figure 3B). On average, the relative cell abundance estimated  
465 using the gene abundance increased or decreased by 1.8-fold compared to the true relative cell  
466 abundance, and the empirical probability of correctly identifying the most abundant OTU based  
467 on the gene abundance is only around 13% (Figure 3C). Correcting for 16S rRNA GCN  
468 improves the estimated relative cell abundance (Figure 3B). As expected, the improvement is  
469 greatest when the adjusted NSTI is small (i.e., when there are closely related reference genomes),  
470 and it gradually diminishes when the adjusted NSTI increases. At the smallest adjusted NSTI, the  
471 average fold change of the estimated relative cell abundance decreases to 1.1-fold after 16S  
472 rRNA GCN correction and the empirical probability of correctly identifying the most abundant  
473 OTU increases to around 65% (Figure 3C).

474  
475 Because we predict each OTU's 16S rRNA GCN with a confidence estimate, we can provide 95%  
476 confidence intervals (95% CIs) for their relative cell abundance as well. Ideally, 95% of the true  
477 relative cell abundances should be covered by the 95% CIs. Figure 3D shows that the average  
478 coverage probability of the true relative cell abundance is about 98% across NSTD cutoffs,  
479 indicating that our 95% CIs are slightly over-conservative. Similarly, we can also calculate the  
480 coverage probability of our 95% CI to the relative gene abundance. As expected, when the  
481 coverage probability to the relative gene abundance increases, the improvement by GCN  
482 correction (quantified by the relative reduction in the difference between the estimated and true  
483 cell abundances) decreases (Figure 3E), and that when this coverage probability is below 95%,  
484 GCN correction always results in strong improvement in relative cell abundance estimates. In

485 empirical studies when the true abundance is unknown, we can use the coverage probability to  
486 the relative gene abundance as a conservative statistic to decide if GCN correction for a  
487 community will likely improve the relative abundance estimation or not. For the most abundant  
488 OTU in the community, we can calculate its support value from the 16S rRNA GCN's  
489 confidence estimates. We found that the calculated support value matches the empirical  
490 probability that the most abundant OTU is correctly identified (Figure 3C).

491  
492 To demonstrate the effect of 16S rRNA GCN correction in empirical data, we analyzed the data  
493 from the first phase of the Human Microbiome Project (HMP1) and the 2000-sample subset of  
494 Earth Microbiome Project (EMP). We found that on average the relative cell abundance with and  
495 without 16S rRNA GCN correction changes around 1.3-fold in HMP1 and 1.6-fold in EMP.  
496 Since the true abundance of OTUs is unknown, we use the coverage probability of 95% CIs to  
497 the relative gene abundance described above to evaluate the effect of GCN correction. Our  
498 results indicate that a majority of HMP1 (over 82%) and EMP (over 90%) samples have a  
499 coverage probability below 95% (as shown in Figure 3F). Our simulations demonstrate that GCN  
500 correction improves the accuracy of relative cell abundance estimation in samples with coverage  
501 probability less than 95% (as demonstrated in Figure 3E), suggesting that GCN correction will  
502 likely improve relative cell abundance estimates in these HMP1 and EMP samples. In terms of  
503 the most abundant OTU, we found that the identity of the most abundant OTU changes after  
504 copy number correction in around 20% and 31% of the communities in HMP1 and EMP  
505 respectively. The support values for the most abundant OTUs are around 0.85 on average in both  
506 datasets, indicating high confidence in the identification of the most abundant OTUs.

507

508 *Copy number correction provides limited improvements on beta-diversity analyses*

509 Because 16S rRNA GCN variation affects the estimated relative cell abundances, it may also  
510 affect the beta-diversity analyses such as PCoA, PERMANOVA, and the random forest test that  
511 use the relative cell abundance information. To examine the effect of 16S rRNA GCN variation  
512 on these analyses, we simulated communities at different turnover rates in two types of  
513 environments where 0.25%, 1% or 5% of the OTUs are enriched in one environment compared  
514 to the other (the SC2 dataset). We performed beta-diversity analyses on the simulated data and  
515 generated the PCoA plots (an example with 0.25% enriched signature OTU is given in Figure 4).  
516 We found that when the relative gene abundance is used to calculate the Bray-Curtis  
517 dissimilarity or the Aitchison distance, the positions of the samples in the PCoA plot shift from  
518 their positions based on the true relative cell abundance (solid lines in Figure 4A and B),  
519 although this shift is much smaller if the Aitchison distance is used. Correcting for 16S rRNA  
520 GCN reduces about 56% of the shift in the Bray-Curtis dissimilarity space ( $P < 0.001$ , paired t-test,  
521 Figure 4A) while it reduces about 85% of the shift in the Aitchison distance space ( $P < 0.001$ ,  
522 paired t-test, Figure 4B). Despite the shift in the PCoA plot, we found that the clustering of  
523 communities does not seem to be affected by the 16S rRNA GCN variation. The results with 1%  
524 and 5% enriched signature OTUs are similar to the examples shown in Figure 4.

525

526 In addition to the PCoA plot, we observed a limited effect of 16S rRNA GCN variation on other  
527 beta-diversity analyses. In PERMANOVA, depending on the metric used, the signature OTU  
528 numbers and turnover rates, the proportion of variance explained (PVE) by the environmental  
529 type using the true cell abundances ranges from 5.27 to 17.20% on average. Using gene  
530 abundance, the average PVE ranges from 5.27 to 17.22% and the change in PVE is not



531 statistically significant regardless the metric used, the signature OTU numbers, or the turnover  
532 rates ( $P > 0.002$ , paired t-test with Bonferroni correction,  $\alpha = 9.26 \times 10^{-4}$ , Table S4), indicating that  
533 PERMANOVA is not very sensitive to 16S rRNA GCN variation.

534  
535 It is a common practice to compare the relative cell abundance of OTUs of interest between  
536 environments. We found that such comparison is also not sensitive to 16S rRNA GCN variation  
537 (Table S4), with the fold-change of relative cell abundance estimated using the gene abundance  
538 and the truth highly concordant ( $R^2 > 0.99$ ). For the top OTUs with the highest fold-change in  
539 true cell abundance (i.e., signature OTUs), on average more than 98% of them are also the top  
540 OTUs with highest fold-change in gene abundance, indicating that abundance difference across  
541 environments is not sensitive to 16S rRNA GCN variation. Alternatively, we can use the random  
542 forest test to identify OTUs that are differentially abundant between environments by their  
543 importance scores (defined as the mean decrease in classification accuracy if removed from the  
544 data). We found that the top OTUs ranked by the importance score recovers from 20.0% to 89.0%  
545 of the signature OTUs when the true cell abundances were used (Table S4). When the gene  
546 abundances were used, this recovery rate changes to from 18.0% to 89.32% (Table S4), and the  
547 change is not statistically significant ( $P > 0.032$ , paired t-test with Bonferroni correction,  
548  $\alpha = 1.85 \times 10^{-3}$ ). Correcting for 16S rRNA GCN changes the recovery rate to from 17.8% to 89.2%  
549 (Table S4), and the change is not significant either ( $P > 0.041$ , paired t-test with Bonferroni  
550 correction,  $\alpha = 1.85 \times 10^{-3}$ ).

551  
552 To examine the effect of 16S rRNA GCN variation correction on beta-diversity in empirical data,  
553 we analyzed the beta-diversity using the HMP1 and EMP datasets. Because we observed that the

554 effect of GCN correction is independent of the metric used in beta-diversity analyses, we only  
555 used Bray-Curtis dissimilarity in HMP1 and EMP datasets. We found that correction of 16S  
556 rRNA GCN does not seem to affect the clustering of communities by body sites in the HMP1  
557 PCoA plot. Pairwise PERMANOVA shows that the mean PVE by the body site in HMP1 is 14.9%  
558 before 16S rRNA GCN correction and decreases marginally to 14.6% after correction, and the  
559 PVEs using the gene abundance and the corrected cell abundance are also highly concordant  
560 ( $R^2 > 0.98$ ). In EMP, within each level-2 environment (EMPO2), the average PVE by level-3  
561 environment (EMPO3) remains at 7.7% before and after 16S GCN correction and the PVEs  
562 using the gene abundance and the corrected cell abundance are highly concordant ( $R^2 > 0.99$ ) as  
563 well. On the other hand, pairwise random forest tests yield similar results before and after 16S  
564 rRNA GCN correction, with around 9 out of the top 10 features identified by the random forest  
565 test remaining unchanged before and after correction in HMP1 and around 8 out of the top 10  
566 unchanged in EMP. In terms of the fold-change of relative cell abundances between body sites,  
567 we found that copy number correction has little impact as the estimated fold-change before and  
568 after correction are highly similar ( $R^2 > 0.95$ ) in both datasets.

569

#### 570 *Predicting 16S rRNA GCNs for SILVA OTUs*

571 Using *RasperGade16S*, we predicted the 16S rRNA GCN for 592605 bacterial OTUs (99%  
572 identity) in the release 132 of the SILVA database. Overall, the median adjusted NSTD for all  
573 bacterial OTUs is 0.070 substitutions/site, and 34.7% of the predictions have a high confidence  
574 of 95% or greater, and 74.9% of the predictions have a moderate confidence of 50% or greater  
575 (Table 2). This shows that for most OTUs in the SILVA database, the phylogenetic distance to a  
576 reference 16S rRNA is small enough that we can have reasonable confidence in the predictions.

577 In comparison, randomly guessing has a null confidence of around 6.7% (1 out of 15 possible  
 578 GCNs). Among major phyla with more than 10000 OTUs, the proportion of highly confident  
 579 predictions varies greatly (Table 2), with Cyanobacteria having the lowest proportion of 19.1%  
 580 and Acidobacteria having the highest proportion of 50.4%. Similarly, the proportion of  
 581 moderately confident predictions varies from 58.3% to 89.5% among these phyla. Interestingly,  
 582 the proportions of highly confident predictions closely match the proportions of slowly-evolving  
 583 OTUs in each phylum (Table 2), suggesting a causal relationship between them.

584

585 **Table 2. Summary of SILVA 16S rRNA GCN predictions.**

| Taxonomic group | Number of OTUs | Median adjusted NSTD (substitutions/site) | Proportion of OTUs in slowly-evolving group | Proportion of highly confident predictions | Proportion of moderately confident predictions |
|-----------------|----------------|-------------------------------------------|---------------------------------------------|--------------------------------------------|------------------------------------------------|
| Bacteria        | 592605         | 0.070                                     | 34.9%                                       | 34.7%                                      | 74.9%                                          |
| Proteobacteria  | 238929         | 0.062                                     | 43.4%                                       | 43.1%                                      | 85.4%                                          |
| Firmicutes      | 149757         | 0.091                                     | 21.6%                                       | 21.5%                                      | 68.9%                                          |
| Actinobacteria  | 60510          | 0.061                                     | 45.2%                                       | 45.2%                                      | 89.5%                                          |
| Bacteroidetes   | 55663          | 0.117                                     | 29.9%                                       | 29.8%                                      | 58.3%                                          |
| Acidobacteria   | 14534          | 0.006                                     | 50.4%                                       | 50.4%                                      | 82.7%                                          |
| Cyanobacteria   | 13970          | 0.285                                     | 19.9%                                       | 19.1%                                      | 60.5%                                          |

586 Highly confident predictions are defined as predictions with a confidence of 95% or greater.  
 587 Moderately confident predictions are defined as predictions with a confidence of 50% or greater.  
 588

589 *Vast majorities of bacterial community studies should benefit from copy number correction*

590 To examine if analysis of real communities would benefit from 16S rRNA GCN correction, we  
 591 calculated the adjusted NSTI for 113842 communities in the microbiome resource platform  
 592 MGnify (formerly known as EBI Metagenomics) [43] that passed our quality control. These

593 microbiomes were sampled from various environments and include host-associated microbiomes  
594 in animals and plants and free-living microbiomes in soil and aquatic environments (Table S5).  
595 The adjusted NSTI varies greatly among samples and the median across all samples is 0.01  
596 substitutions/site. For example, the smallest adjusted NSTI ( $8.2 \times 10^{-7}$  substitutions/site) comes  
597 from a human vaginal clinical sample that is dominated by one OTU (relative cell  
598 abundance >0.98). This OTU is closely related to *Lactobacillus iners* in the slowly-evolving  
599 group, which results in the extremely small adjusted NSTI. On the other hand, the largest  
600 adjusted NSTI (0.6 substitutions/site) belongs to a sample from the rumen of dairy cows. The  
601 majority of OTUs in this sample has an adjusted NSTD greater than 0.1 substitutions/site and  
602 account for more than 90% of the total cell abundance. In the simulated communities, we  
603 observed that GCN correction significantly improves the estimated relative cell abundances  
604 ( $P < 0.001$ , paired t-test) even when the adjusted NSTI reaches 0.3 substitutions/site. We found  
605 that more than 99% of the communities from MGnify have an adjusted NSTI less than 0.3  
606 substitutions/site, suggesting that they should benefit from 16S rRNA GCN correction when  
607 estimating the relative cell abundances. The distribution of adjusted NSTI varies among different  
608 environmental types (Figure 5), but the proportion of communities that will likely benefit from  
609 16S rRNA GCN correction remains high, ranging from 98% to 100%.

610

## 611 **Discussion**

612 16S rRNA GCN variation skews bacterial community composition estimated from the 16S  
613 rRNA read count. To correct for the bias introduced by the GCN variation, several methods have  
614 been developed to predict GCN from reference genomes. A recent study has pointed out that the  
615 GCN predictions come with inherent uncertainty, particularly for these taxa without closely

616 related genomes [12]. The concern is that inaccurate predictions can introduce noise to  
617 community compositions that can be worse than the original GCN-related biases, thereby raising  
618 doubt about the usefulness of the 16S rRNA GCN correction in bacterial diversity analyses  
619 [8,12].

620

621 We address the inherent uncertainty problem in 16S rRNA GCN prediction by directly  
622 measuring it with confidence estimates. Using simulations and cross-validation, we show that the  
623 PE method implemented in *RasperGade16S* outperforms other methods in both the precision and  
624 recall rates. This method's strength comes from three features of its modeling of the 16S rRNA  
625 GCN evolution: implementation of a pulsed evolution model and accounting for the rate  
626 heterogeneity and time-independent trait variation. Pulsed evolution model expects no trait  
627 changes to occur over a short branch as jumps are not likely to happen on that branch. This leads  
628 to a higher confidence to 16S rRNA GCN prediction with a short NSTD, and thus improves the  
629 recall of the accurate predictions. By incorporating rate heterogeneity, we can make predictions  
630 in the slowly-evolving groups with high confidence, even when their NSTDs are large, thereby  
631 further improving the overall precision and recall rates. In the reference phylogeny, 48% of  
632 branches were estimated to fall within this slowly-evolving group, whose evolution rate is 145  
633 times slower compared to that of the regularly-evolving group. The third source of improvement  
634 for *RasperGade16S* comes from accounting for time-independent variation, which can result  
635 from measurement error and intraspecific variation. We show that failing to account for time-  
636 independent variation results in model misspecification (Table 1) and overestimated rate of  
637 evolution for the pic method.

638

639 Having confidence estimates is critical in the presence of inherent uncertainty because they  
640 provide direct evaluation of the uncertainty associated with the predictions. Although such  
641 uncertainty is positively correlated with the NSTD (Figure 2), use of NSTD as a measure of  
642 uncertainty lacks a clear statistical meaning. Using cross-validation, we show that  
643 *RasperGade16S* has high precision (around 0.96), which means for predictions with high  
644 confidence ( $\geq 95\%$ ), 96% of the predictions are accurate. Therefore, we can use the confidence  
645 score provided by *RasperGade16S* to select high-quality predictions if necessary, or we can draw  
646 firm conclusions from the 16S rRNA data when the confidence is high. For example, 16S rRNA  
647 GCN has been linked to the ecological strategy of bacterial species, with oligotrophs generally  
648 having low GCNs and copiotrophs having higher GCNs [17,18]. To better understand the overall  
649 ecological strategy of a bacterial community, we can predict its members' GCNs and classify the  
650 community into either an oligotroph-dominant, copiotroph-dominant or a mixed community, and  
651 we can do this with a measure of confidence.

652  
653 The application of confidence estimation extends beyond the prediction of 16S rRNA GCN.  
654 Because the uncertainty in the prediction is inherited by statistics derived from the predicted 16S  
655 rRNA GCN, we can estimate the uncertainty and confidence intervals of important parameters in  
656 downstream analyses, such as the relative cell abundance. With confidence intervals, we can  
657 draw more meaningful and sound conclusions, such as identifying the most abundant OTU in the  
658 community with a support value. Getting confidence estimates of the relative cell abundance is  
659 also important for predicting the functional profile of a community based on 16S rRNA  
660 sequences. Although PICRUST2 uses an extremely lenient NSTD cut-off to eliminate  
661 problematic sequences, it does not provide an accurate confidence measurement of its

662 predictions. As shown in this study, the default maximum parsimony method used by  
663 PICRUST2 to predict 16S rRNA GCN essentially assumes there is no uncertainty in the  
664 predictions, which is unrealistic and leads to poor precision. Incorporation of a more meaningful  
665 confidence estimate of 16S rRNA GCN prediction in PICRUST2 should make its functional  
666 profile prediction more informative.

667

668 We predicted GCN for 592605 bacterial OTU99 in the SILVA database. Not surprisingly, we  
669 observed considerable uncertainty in the GCN predictions. This is because only a small fraction  
670 of bacterial diversity in the SILVA database has been captured by the fully sequenced genomes.  
671 In addition, 65.1% of OTUs in SILVA database belong to the regularly-evolving group and the  
672 confidence of predictions for these OTUs is capped at 85% because of the time-independent  
673 variation. However, we would like to point out that natural communities are not a random  
674 subsampling of the SILVA OTUs and the median NSTI (NSTD weighted by community  
675 members' relative abundance) of the 113842 bacterial communities we examined is 0.01  
676 substitutions/site, much lower than the median NSTD of SILVA OTUs. Strikingly, 99% of  
677 113842 bacterial communities we examined have an adjusted NSTI less than 0.3  
678 substitutions/site, a range where we show that GCN correction improves the accuracy of the  
679 relative cell abundance estimation (Figure 3B). Because these communities represent a  
680 comprehensive and diverse list of natural and engineered environments, we recommend applying  
681 16S rRNA GCN correction to practically any microbial community regardless of the  
682 environmental type if accurate estimates of relative cell abundance are critical to the study. Our  
683 results therefore affirm the conclusion of the previous studies based on analyses of a much  
684 smaller number of communities [5,7].

685  
686 McLaren et al. have shown that statistics that are functions of individual taxon's relative  
687 abundance will be sensitive to the systematic biases introduced in the sequencing and data  
688 analysis pipeline (including bias introduced by 16S rRNA GCN variation) [44]. Contrary to  
689 some popular belief, these biases will not cancel out when analyzing the differences between  
690 samples that have been measured by the same protocol [44]. Nevertheless, few studies have  
691 investigated to what extent the bias introduced by 16S rRNA GCN variation will have on the  
692 microbiome beta diversity analyses. We show that the effect sizes of 16S rRNA bias on beta-  
693 diversity analyses are small. Correcting 16S rRNA GCN provides limited improvement on the  
694 beta-diversity analyses such as random forest analysis and PERMANOVA test. One possible  
695 reason is that for an OTU, the fold change in the relative cell abundance between samples  
696 remains more or less the same with or without correcting for the copy number. For example,  
697 assuming the estimated relative cell abundances of an OTU in samples A and B are  $r_a$  and  $r_b$   
698 respectively without copy number correction. When correcting for the copy number, its relative  
699 abundance is adjusted with the scaling factor ACN/GCN, where the GCN is the 16S rRNA copy  
700 number of the OTU and the ACN is the average copy number of the sample. Assuming the ACN  
701 does not vary much between samples, then the scaling factor for the OTU will be roughly the  
702 same in samples A and B. So even with copy number correction, the relative abundance change  
703 will still be close to  $r_a/r_b$ .

704  
705 It should be noted that having a confidence associated with the 16S rRNA GCN prediction helps  
706 to estimate the uncertainty of the prediction, but it does not improve the accuracy of the  
707 prediction. Accuracy of the prediction is constrained by the inherent uncertainty, which can only



708 be improved by better sampling the reference genomes. However, as our current sampling is  
709 inadequate for accurate 16S rRNA GCN prediction of all environmental bacteria, we believe that  
710 incorporating confidence estimates is the best practice to control for the uncertainty in the 16S  
711 rRNA based bacterial diversity studies, as opposed to not correcting the GCN bias as previously  
712 suggested [8,12]. Based on bootstrapping, we have demonstrated that confidence intervals or  
713 support values can be calculated for key statistics in downstream analyses such as relative cell  
714 abundance and beta diversity. With the uncertainty incorporated into the statistical tests, users  
715 may decide if correcting for GCN variation is worthwhile on a case-by-case basis.

716

## 717 **Conclusion**

718 We have developed a robust model to estimate the confidence of 16S rRNA GCN predictions.  
719 As a rule of thumb, we recommend that, regardless of the environmental type, 16S rRNA GCN  
720 correction be applied to virtually all 16S rRNA bacterial communities when estimating their  
721 compositional and functional profiles. However, for commonly used bacterial beta-diversity  
722 analyses, the GCN correction does not appear to be necessary.

723

## 724 **List of abbreviations**

725 16S rRNA: 16S ribosomal RNA. GCN: gene copy number. 16S GCN: 16S rRNA gene copy  
726 number. OTU: operational taxonomic unit. BM: Brownian motion. PE: pulsed evolution. PIC:  
727 phylogenetically independent contrast. AIC: Akaike information criterion. NSTI: nearest-  
728 sequenced-taxon-index. NSTD: nearest-sequenced-taxon-distance. CI: confidence interval.  
729 PCoA: principal coordinates analysis. PERMANOVA: permutational multivariate analysis of  
730 variance

731

732 **Declarations**

733 *Availability of data and material*

734 The NCBI accession numbers of the reference genomes, the representative 16S rRNA sequences  
735 and alignments, the reference phylogeny, the predicted GCN for OTU99 in the SILVA database,  
736 and the simulated bacterial community data generated during the current study are available in  
737 the Dryad repository

738 ([https://datadryad.org/stash/share/OaS9BjM\\_kIVdJ3WkZRT7KO8fDr8D4k8jy3LsOtlYELM](https://datadryad.org/stash/share/OaS9BjM_kIVdJ3WkZRT7KO8fDr8D4k8jy3LsOtlYELM)).

739 The R package *RasperGade16S* can be downloaded from [https://github.com/wu-lab-](https://github.com/wu-lab-uva/RasperGade16S)  
740 [uva/RasperGade16S](https://github.com/wu-lab-uva/RasperGade16S). The original scripts to conduct the analyses in this study are available in the  
741 GitHub repository (<https://github.com/wu-lab-uva/16S-rRNA-GCN-Predcition>).

742

743 *Competing interests*

744 The authors declare that they have no competing interests.

745

746 *Funding*

747 Not applicable

748

749 *Authors' contributions*

750 YG developed the R package *RasperGade16S*, conducted statistical analyses in the manuscript  
751 and was a major contributor in writing the manuscript. MW conceptualized the rate  
752 heterogeneity model and was a major contributor in writing the manuscript. Both authors read  
753 and approved the final manuscript.

754

## 755 **References**

- 756 1. Quast C, Pruesse E, Yilmaz P, Gerken J, Schweer T, Yarza P, et al. The SILVA ribosomal  
757 RNA gene database project: improved data processing and web-based tools. *Nucleic Acids*  
758 *Research*. 2012;41:D590–6.
- 759 2. DeSantis TZ, Hugenholtz P, Larsen N, Rojas M, Brodie EL, Keller K, et al. Greengenes, a  
760 chimera-checked 16S rRNA gene database and workbench compatible with ARB. *Applied and*  
761 *Environmental Microbiology*. 2006;72:5069–72.
- 762 3. Klappenbach JA. rrndb: the ribosomal RNA operon copy number database. *Nucleic Acids*  
763 *Research*. 2001;29:181–4.
- 764 4. Větrovský T, Baldrian P. The variability of the 16S rRNA gene in bacterial genomes and its  
765 consequences for bacterial community analyses. *PLoS ONE*. 2013;8:e57923.
- 766 5. Kembel SW, Wu M, Eisen JA, Green JL. Incorporating 16S gene copy number information  
767 improves estimates of microbial diversity and abundance. *PLoS Computational Biology*.  
768 2012;8:16–8.
- 769 6. McLaren MR, Willis AD, Callahan BJ. Consistent and correctable bias in metagenomic  
770 sequencing experiments. *Elife*. 2019;8.
- 771 7. Angly FE, Dennis PG, Skarszewski A, Vanwonderghem I, Hugenholtz P, Tyson GW.  
772 CopyRighter: a rapid tool for improving the accuracy of microbial community profiles through  
773 lineage-specific gene copy number correction. *Microbiome*. 2014;2:11.
- 774 8. Starke R, Pylro VS, Morais DK. 16S rRNA gene copy number normalization does not provide  
775 more reliable conclusions in metataxonomic surveys. *Microbial Ecology*. 2021;81.
- 776 9. Bowman JS, Ducklow HW. Microbial communities can be described by metabolic structure:  
777 A general framework and application to a seasonally variable, depth-stratified microbial  
778 community from the coastal west Antarctic peninsula. *PLOS ONE*. 2015;10:e0135868.
- 779 10. Langille MGI, Zaneveld J, Caporaso JG, McDonald D, Knights D, Reyes JA, et al. Predictive  
780 functional profiling of microbial communities using 16S rRNA marker gene sequences. *Nature*  
781 *Biotechnology*. 2013;31:814–21.
- 782 11. Zaneveld JRR, Thurber RL V. Hidden state prediction: a modification of classic ancestral  
783 state reconstruction algorithms helps unravel complex symbioses. *Frontiers in Microbiology*.  
784 2014;5:431.
- 785 12. Louca S, Doebeli M, Parfrey LW. Correcting for 16S rRNA gene copy numbers in  
786 microbiome surveys remains an unsolved problem. *Microbiome*. 2018;6:41.
- 787 13. Ané C. Analysis of comparative data with hierarchical autocorrelation. *The Annals of*  
788 *Applied Statistics*. 2008;2:1078–102.
- 789 14. Landis MJ, Schraiber JG. Pulsed evolution shaped modern vertebrate body sizes.  
790 *Proceedings of the National Academy of Sciences*. 2017;114:13224–9.
- 791 15. Joy JB, Liang RH, McCloskey RM, Nguyen T, Poon AFY. Ancestral reconstruction. *PLOS*  
792 *Computational Biology*. 2016;12:e1004763.

- 793 16. Elliot MG, Mooers AØ. Inferring ancestral states without assuming neutrality or gradualism  
794 using a stable model of continuous character evolution. *BMC Evolutionary Biology*.  
795 2014;14:226.
- 796 17. Roller BRK, Stoddard SF, Schmidt TM. Exploiting rRNA operon copy number to investigate  
797 bacterial reproductive strategies. *Nature Microbiology*. 2016;1:1–7.
- 798 18. Lauro FM, McDougald D, Thomas T, Williams TJ, Egan S, Rice S, et al. The genomic basis  
799 of trophic strategy in marine bacteria. *Proceedings of the National Academy of Sciences*.  
800 2009;106:15527–33.
- 801 19. Eldredge N, Gould SJ. Punctuated equilibria - an alternative to phyletic gradualism. *Models*  
802 *in Paleobiology*. 1972. p. 82–115.
- 803 20. Uyeda JC, Hansen TF, Mcpeek A. The million-year wait for macroevolutionary bursts.  
804 *Proceedings of the National Academy of Sciences*. 2011;108:15908–13.
- 805 21. Yano K, Masuda K, Akanuma G, Wada T, Matsumoto T, Shiwa Y, et al. Growth and  
806 sporulation defects in *Bacillus subtilis* mutants with a single *rrn* operon can be suppressed by  
807 amplification of the *rrn* operon. *Microbiology*. 2016;162:35–45.
- 808 22. Rastogi R, Wu M, DasGupta I, Fox GE. Visualization of ribosomal RNA operon copy  
809 number distribution. *BMC Microbiology*. 2009;9:208.
- 810 23. Stoddard SF, Smith BJ, Hein R, Roller BRK, Schmidt TM. *rrnDB*: Improved tools for  
811 interpreting rRNA gene abundance in bacteria and archaea and a new foundation for future  
812 development. *Nucleic Acids Research*. 2015;43.
- 813 24. Sadeghifard N, Guñrtler V, Beer M, Seviour RJ. The mosaic nature of intergenic 16S-23S  
814 rRNA spacer regions suggests rRNA operon copy number variation in *Clostridium difficile*  
815 strains. *Applied and Environmental Microbiology*. 2006;72:7311–23.
- 816 25. Lee CM, Sieo CC, Abdullah N, Ho YW. Estimation of 16S rRNA gene copy number in  
817 several probiotic *Lactobacillus* strains isolated from the gastrointestinal tract of chicken. *FEMS*  
818 *Microbiology Letters*. 2008;287:136–41.
- 819 26. Bodilis J, Nsigue-Meilo S, Besaury L, Quillet L. Variable copy number, intra-genomic  
820 heterogeneities and lateral transfers of the 16S rRNA gene in *Pseudomonas*. *PLoS ONE*.  
821 2012;7:e35647.
- 822 27. Lavrinienko A, Jernfors T, Koskimäki JJ, Pirttilä AM, Watts PC. Does intraspecific variation  
823 in rDNA copy number affect analysis of microbial communities? *Trends in Microbiology*.  
824 2021;29:19–27.
- 825 28. Viklund J, Ettema TJG, Andersson SGE. Independent genome reduction and phylogenetic  
826 reclassification of the oceanic SAR11 clade. *Molecular Biology and Evolution*. 2012;29.
- 827 29. Moran NA. Accelerated evolution and Muller’s ratchet in endosymbiotic bacteria.  
828 *Proceedings of the National Academy of Sciences*. 1996;93:2873–8.
- 829 30. Wu D, Hugenholtz P, Mavromatis K, Pukall R, Dalin E, Ivanova NN, et al. A phylogeny-  
830 driven genomic encyclopaedia of Bacteria and Archaea. *Nature*. 2009;462.
- 831 31. Katoh K, Standley DM. MAFFT multiple sequence alignment software version 7:  
832 Improvements in performance and usability. *Molecular Biology and Evolution*. 2013;30.

- 833 32. Perisin M, Vetter M, Gilbert JA, Bergelson J. 16Stimator: statistical estimation of ribosomal  
834 gene copy numbers from draft genome assemblies. *The ISME Journal*. 2016;10:1020–4.
- 835 33. Eddy SR. Accelerated profile HMM searches. *PLoS Computational Biology*.  
836 2011;7:e1002195.
- 837 34. Stamatakis A. RAxML version 8: a tool for phylogenetic analysis and post-analysis of large  
838 phylogenies. *Bioinformatics*. 2014;30:1312–3.
- 839 35. Torsten Seemann. Barnap [Internet]. 2018 [cited 2022 Mar 12]. Available from:  
840 <https://github.com/tseemann/barnap>
- 841 36. Felsenstein J. Phylogenies and the comparative method. *American Naturalist*. 1985;125:1–15.
- 842 37. Gao Y, Wu M. Modeling pulsed evolution and time-independent variation improves the  
843 confidence level of ancestral and hidden state predictions. *Systematic Biology*. 2022;
- 844 38. Louca S, Doebeli M. Efficient comparative phylogenetics on large trees. *Bioinformatics*.  
845 2018;34:1053–5.
- 846 39. Barbera P, Kozlov AM, Czech L, Morel B, Darriba D, Flouri T, et al. EPA-ng: Massively  
847 parallel evolutionary placement of genetic sequences. *Systematic Biology*. 2019;68:365–9.
- 848 40. The Human Microbiome Project Consortium. A framework for human microbiome research.  
849 *Nature*. 2012;486:215–21.
- 850 41. Amir A, McDonald D, Navas-Molina JA, Kopylova E, Morton JT, Zech Xu Z, et al. Deblur  
851 rapidly resolves single-nucleotide community sequence patterns. *mSystems*. 2017;2.
- 852 42. Thompson LR, Sanders JG, McDonald D, Amir A, Ladau J, Locey KJ, et al. A communal  
853 catalogue reveals Earth’s multiscale microbial diversity. *Nature*. 2017;551:457–63.
- 854 43. Mitchell AL, Almeida A, Beracochea M, Boland M, Burgin J, Cochrane G, et al. MGnify:  
855 the microbiome analysis resource in 2020. *Nucleic Acids Research*. 2019;48:D570–8.
- 856 44. McLaren MR, Willis AD, Callahan BJ. Consistent and correctable bias in metagenomic  
857 sequencing experiments. *Elife*. 2019;8.

858

## 859 **Figure legends**

860 **Figure 1. The performance of prediction on simulated 16S rRNA GCN.** Using cross-

861 validation of simulated data, the mean estimated uncertainty and confidence of predictions (A),

862 the mean coefficient of determination  $R^2$  of the predictions (B), and the recall (C) and precision

863 (D) of classification of predictions by their associated confidence estimate, plotted against the

864 mean NSTD. The red line is missing in D because no predictions under the BM model have  $\geq 95\%$

865 confidence when the mean NSTD is greater than 0.002 substitutions/site. The error bars

866 represent the 95% CI of the mean.

867

868 **Figure 2. The performance of prediction on empirical 16S rRNA GCN.** Using cross-  
869 validation of empirical data, the mean estimated uncertainty and confidence of predictions (A),  
870 the mean coefficient of determination  $R^2$  of the predictions (B), and the recall (C) and precision  
871 (D) of classification of predictions by their associated confidence estimate, plotted against the  
872 mean NSTD. The error bars represent the 95% CI of the mean. The empirical 16S rRNA GCN  
873 analyzed here are from the 6408 complete genomes in the reference phylogeny.

874

875 **Figure 3. The impact of 16S rRNA GCN variation on estimated relative cell abundances.** (A)  
876 The impact of GCN variation on estimated relative cell abundance based on theoretical  
877 calculations. The color of the lines denotes the ratio of an OTU's of GCN to the average GCN of  
878 the community. (B) The average fold-change to the true relative cell abundance. (C) The  
879 empirical probability of correctly identifying the most abundant OTU in the community and the  
880 support value for the most abundant OTU. (D) The coverage probability of relative cell  
881 abundances' estimated 95% CIs to the true relative cell abundance. Accurate confidence  
882 estimates (95% CIs) should produce a coverage probability of 95% regardless of the adjusted  
883 NSTI (dashed red line). (E) The correlation between the coverage probability to the relative gene  
884 abundance and the improvement by GCN correction. The horizontal red dashed line represents  
885 no improvement in relative cell abundance estimates; the vertical red dashed line represents 95%  
886 coverage probability to the relative gene abundance. The improvement is quantified by the  
887 relative reduction in the difference between the estimated and true cell abundances. (F) The  
888 empirical cumulative distribution of the coverage probability to the relative gene abundance in  
889 2560 samples from the HMP1 dataset and 1856 samples from the EMP dataset. All error bars  
890 represent 95% CI of the mean.

891

892 **Figure 4. The impact of 16S rRNA GCN variation on beta-diversity.** Examples of shift in the  
893 Bray-Curtis dissimilarity (A) and the Aitchison distance (B) matrices due to 16S rRNA GCN  
894 variation. The shift for each metric is visualized in a PCoA plot comparing 20 simulated samples  
895 from two hypothetical environments with 5 signature OTUs (0.25%) in each environment and a  
896 turnover rate of 20%. Solid lines represent the shift of a sample from its true location when using  
897 the gene abundance.

898

899 **Figure 5. The distribution of adjusted NSTI in empirical data.** The distribution of adjusted  
900 NSTI of 113842 communities in the MGnify database representing various environmental types.  
901 The red dashed line marks the adjusted NSTI of 0.3 substitutions/site.

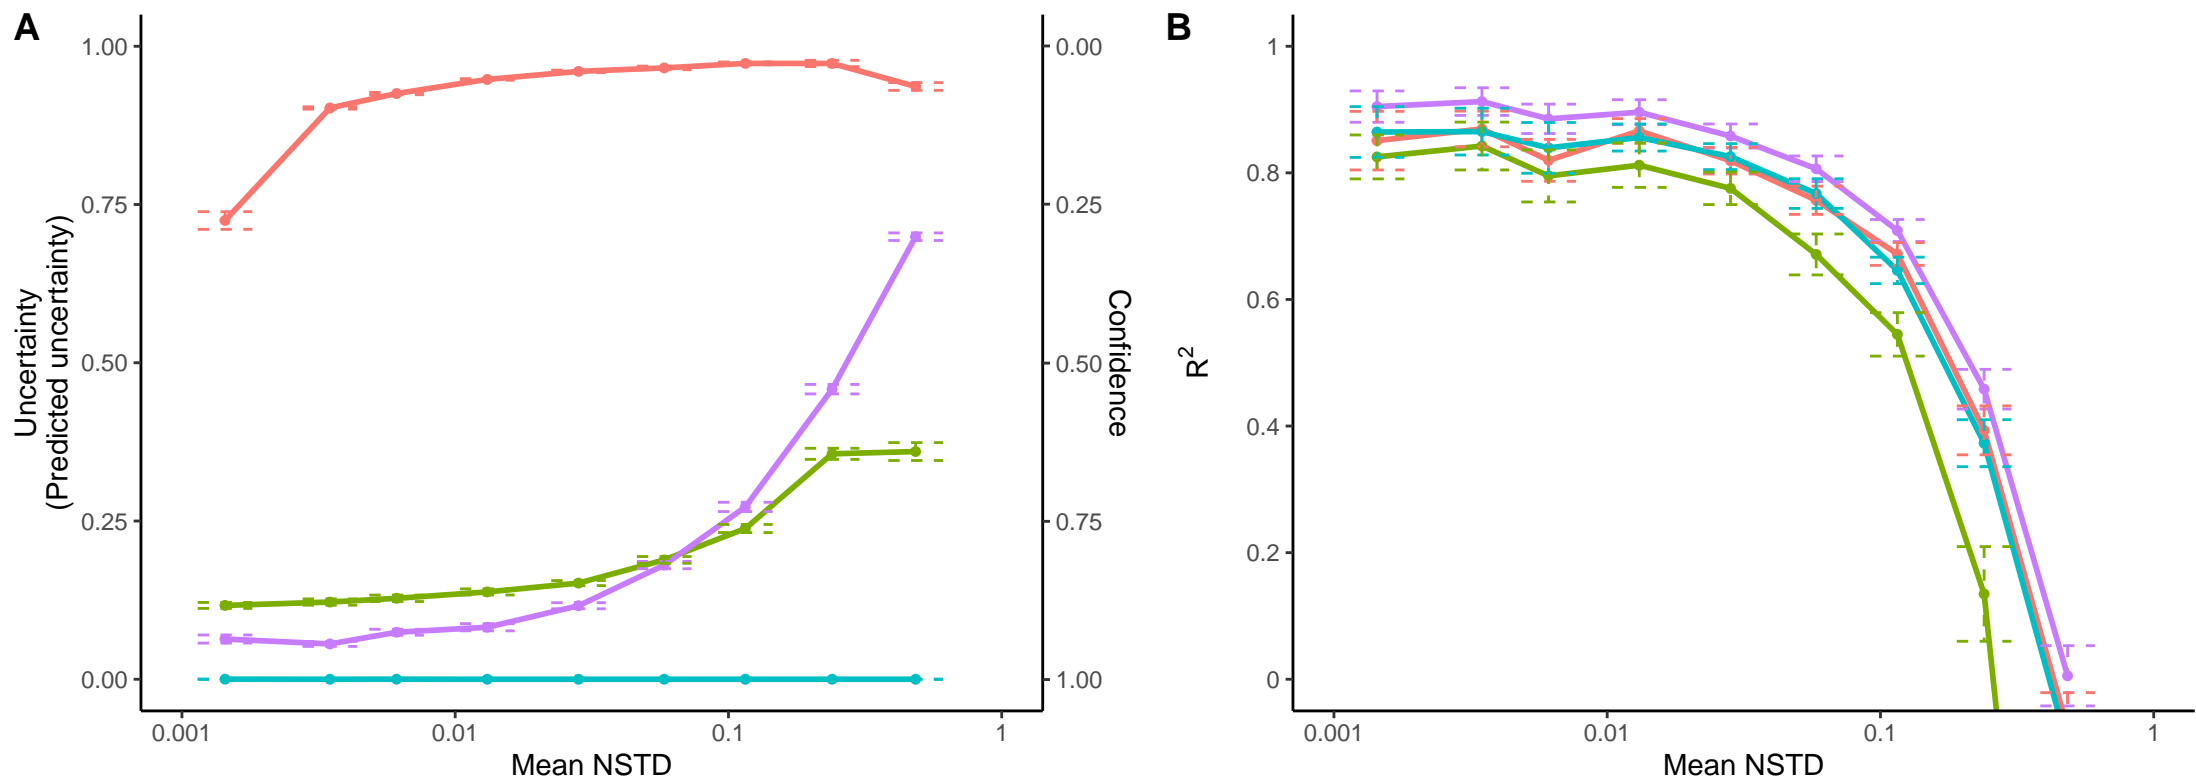



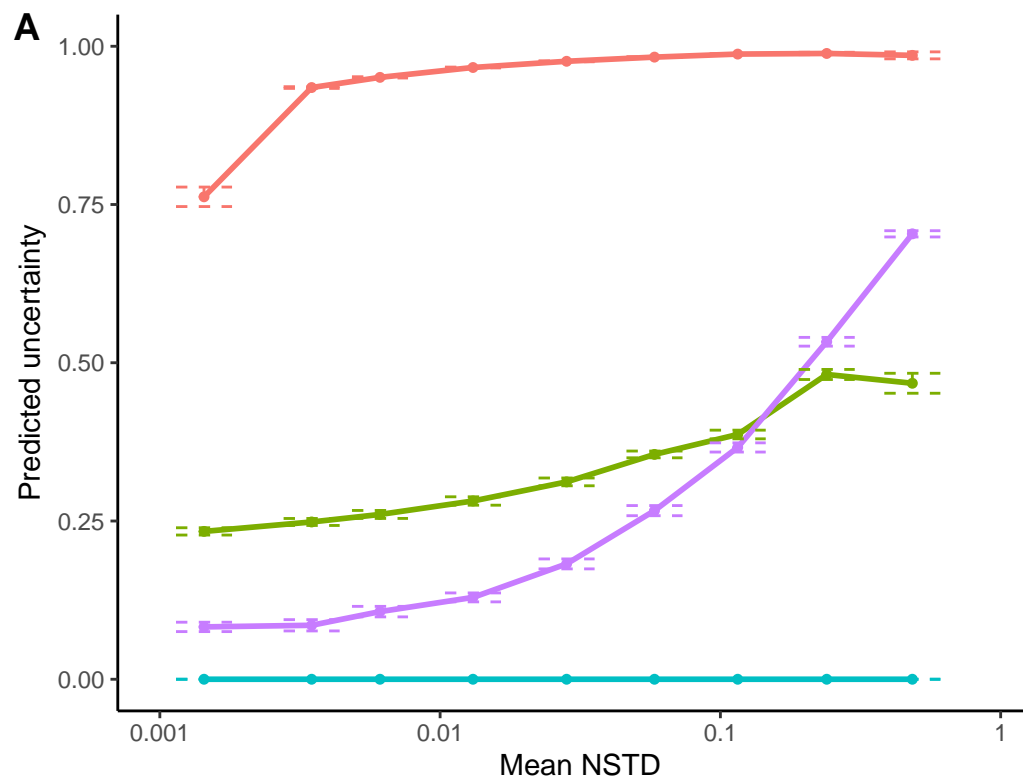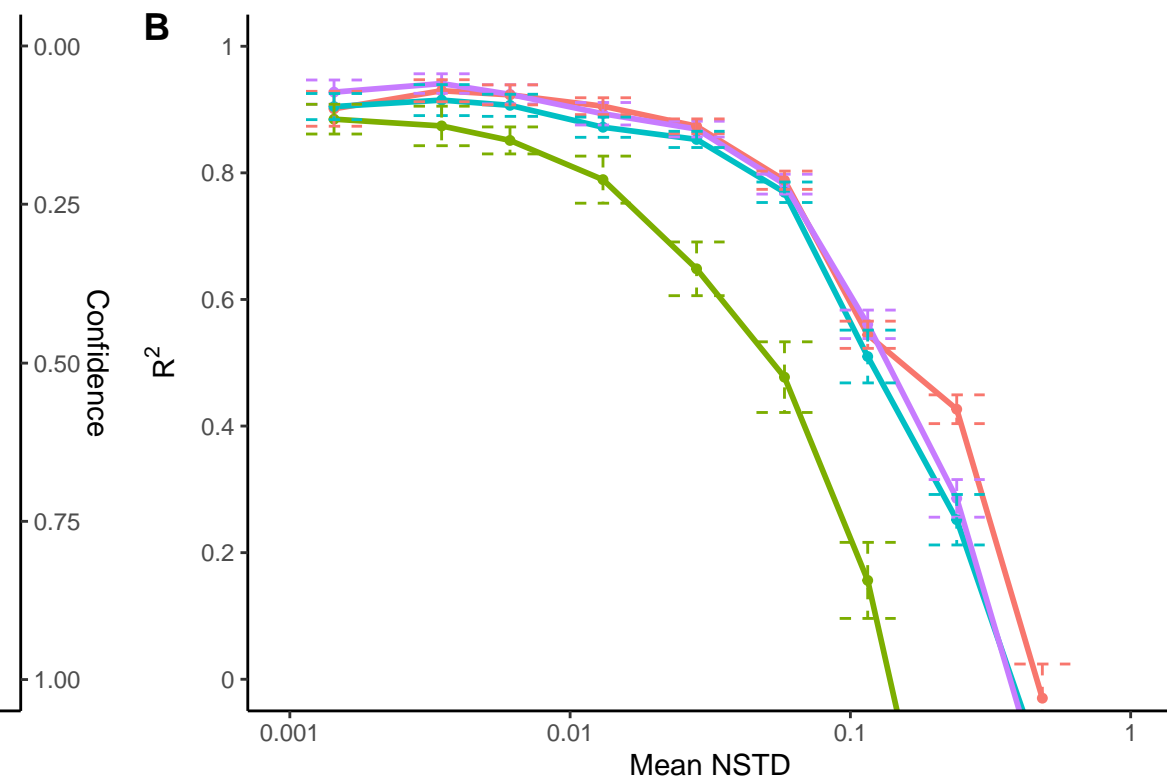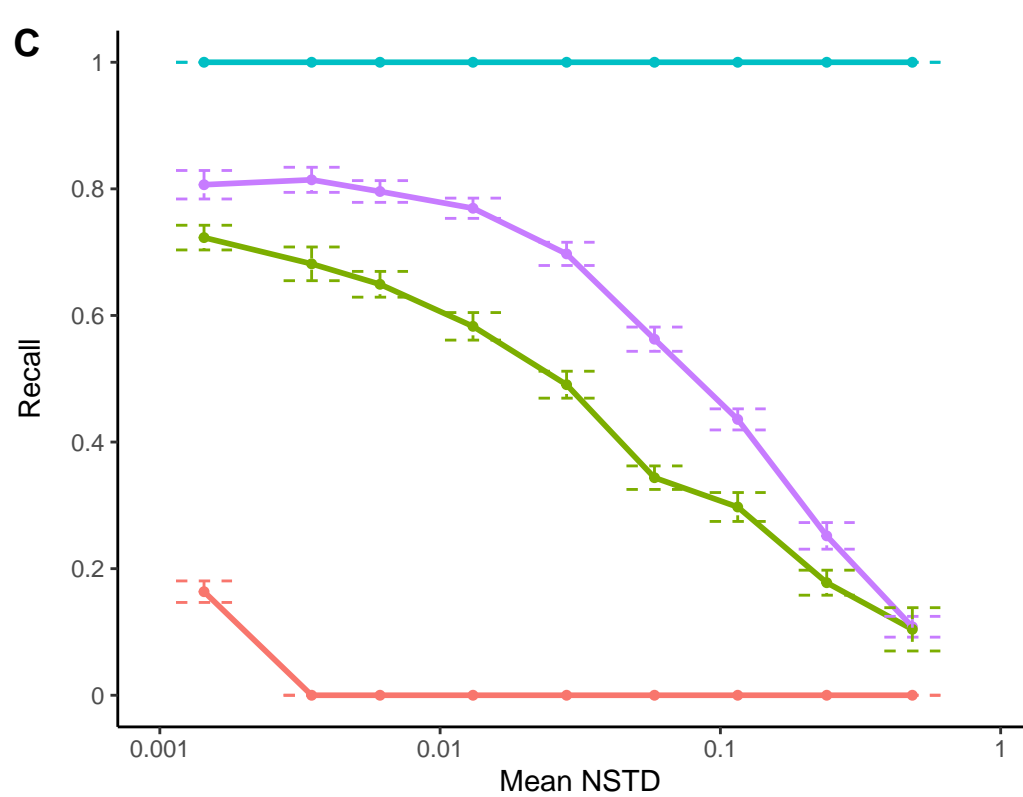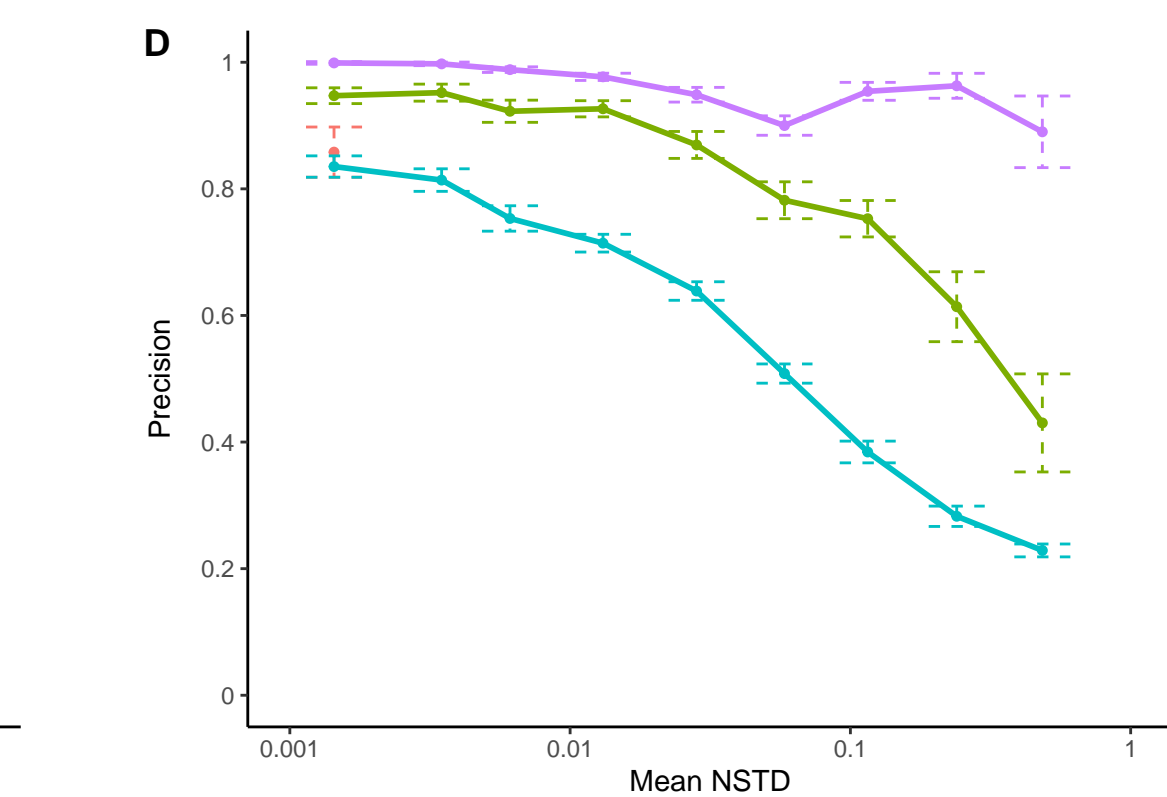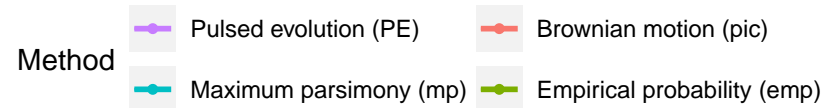

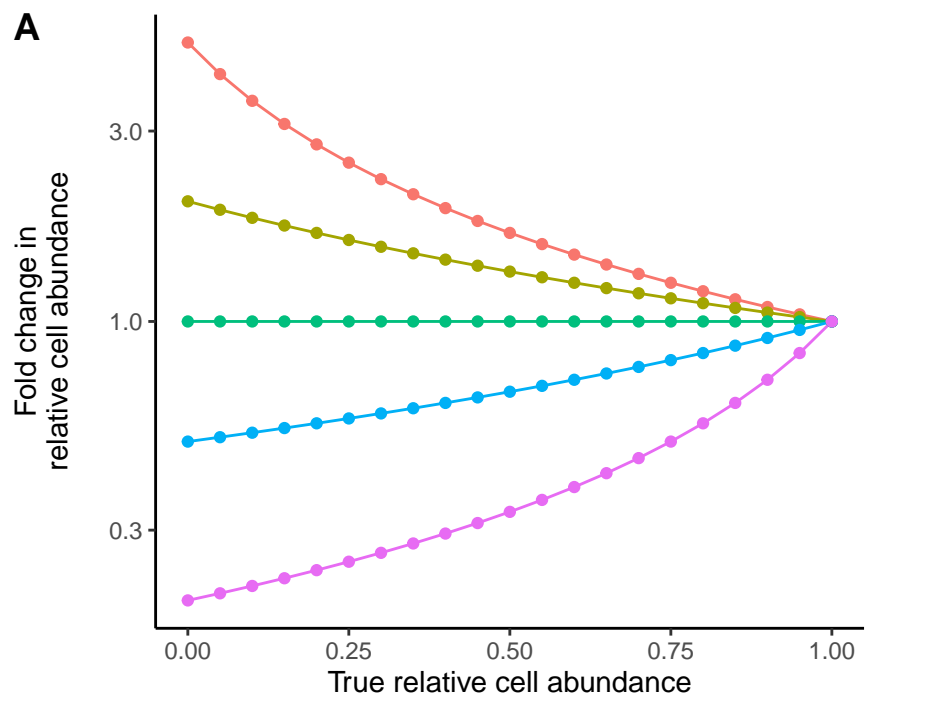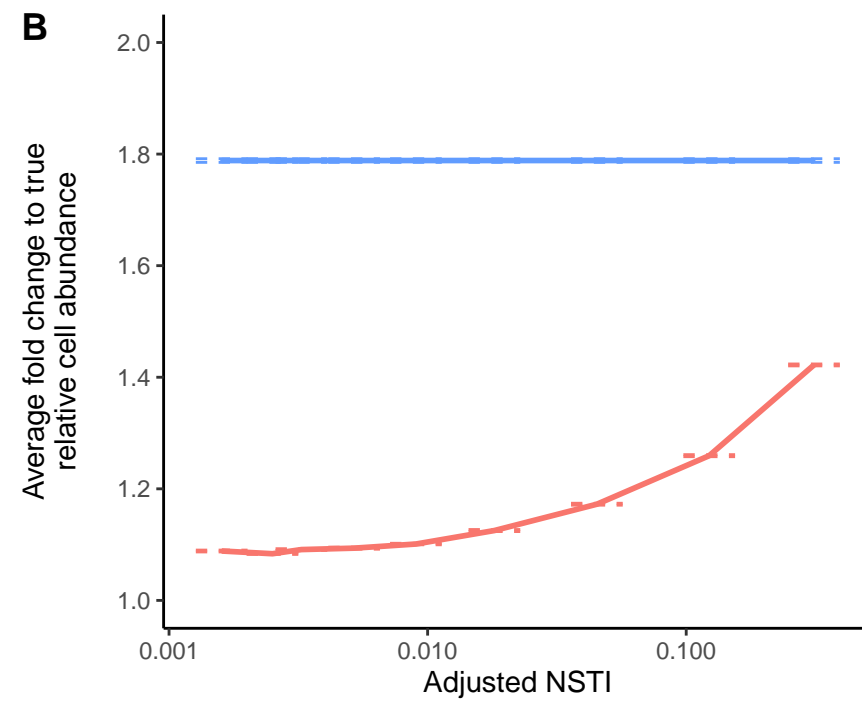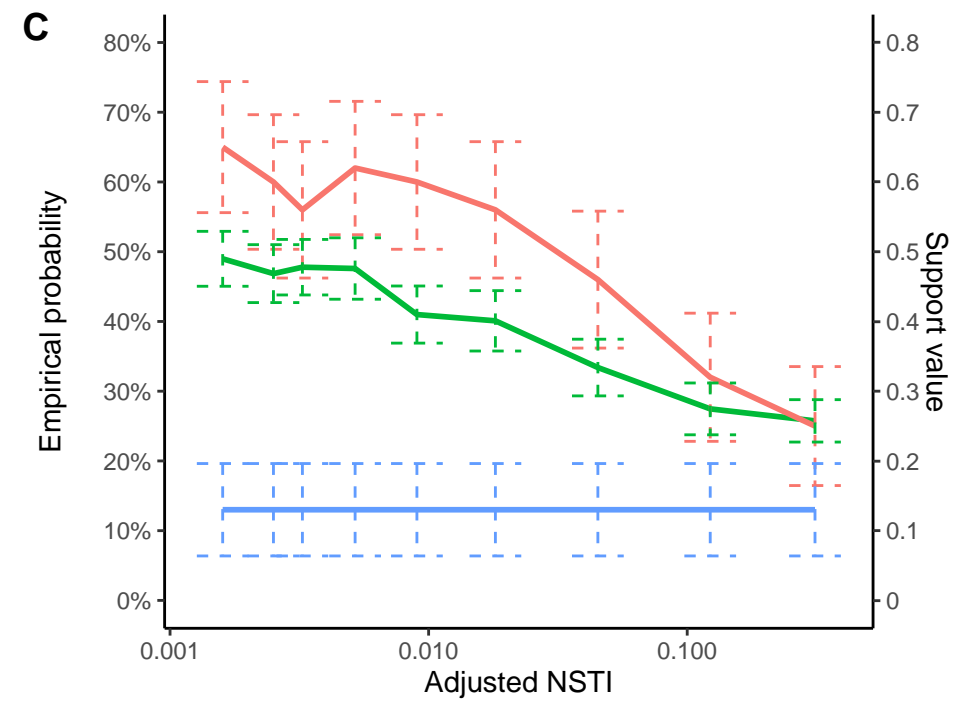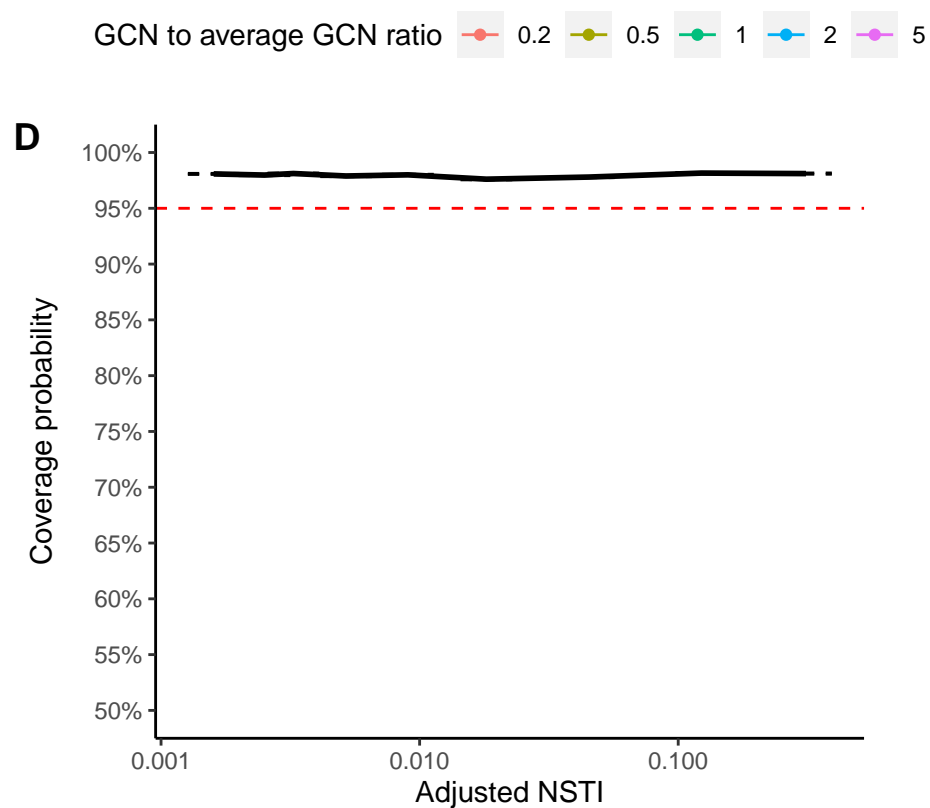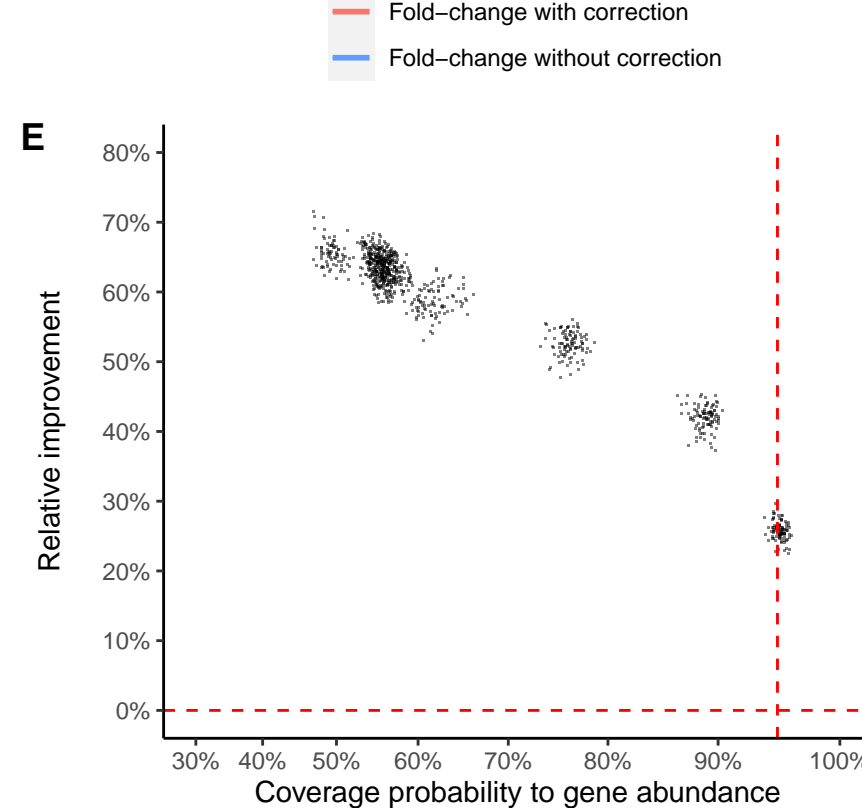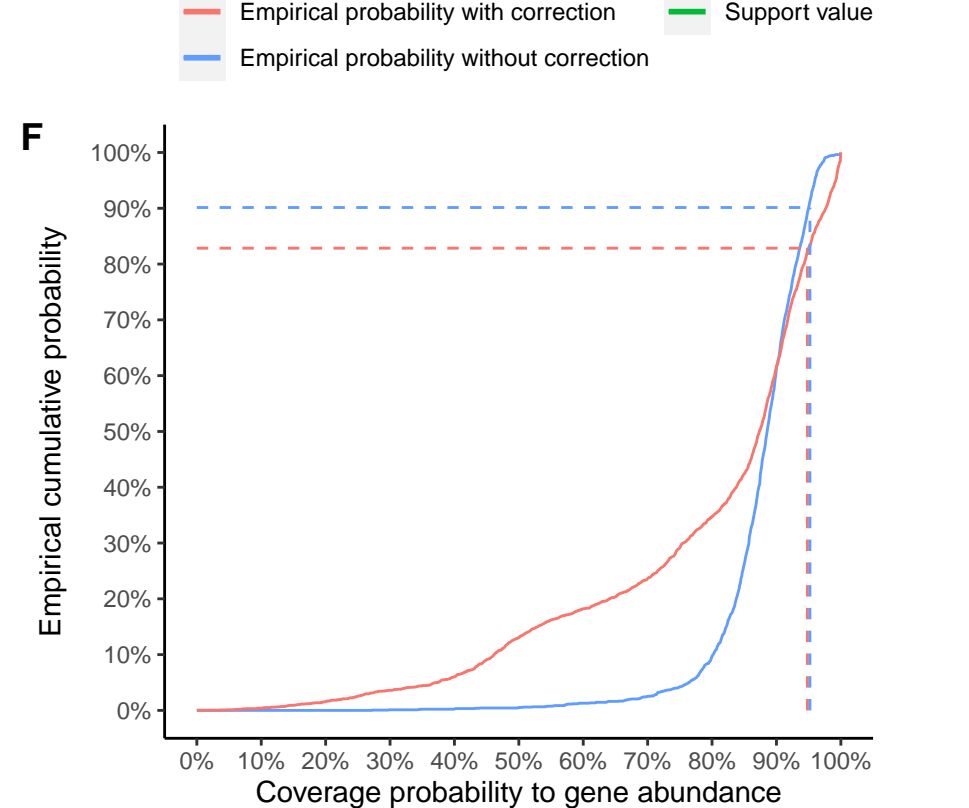

Dataset

- HMP
- EMP

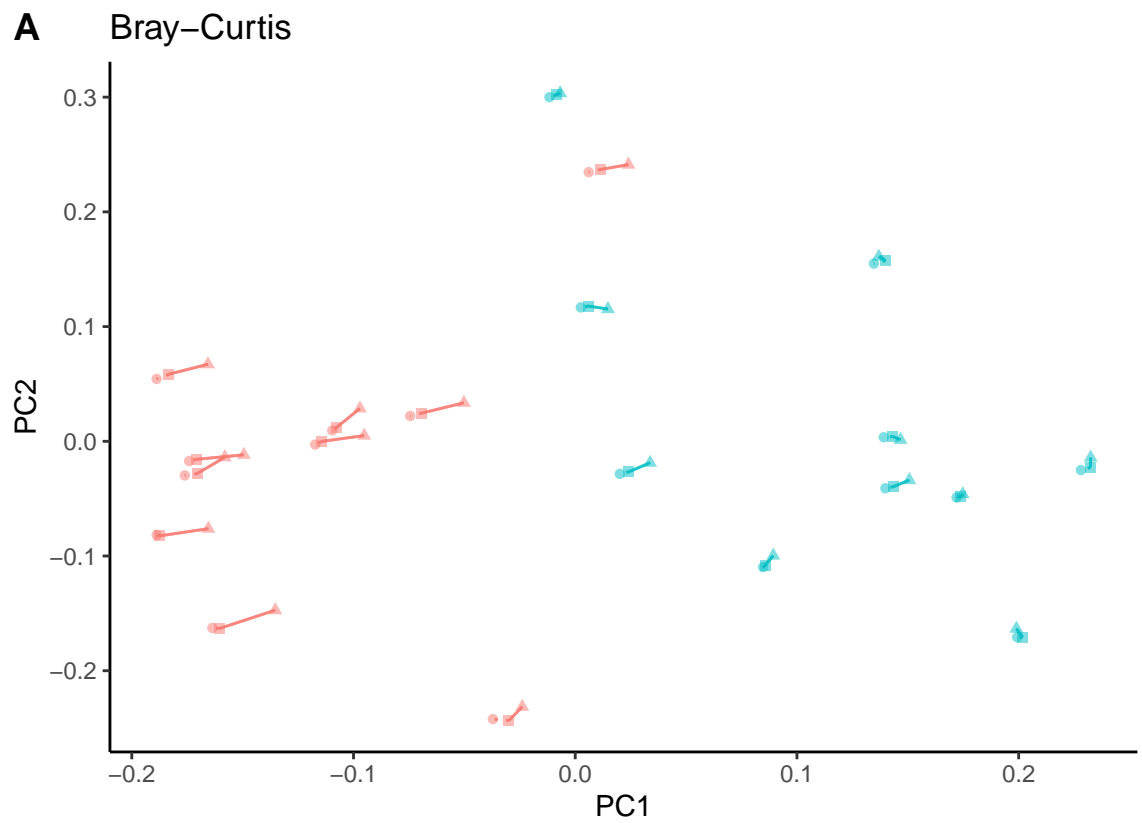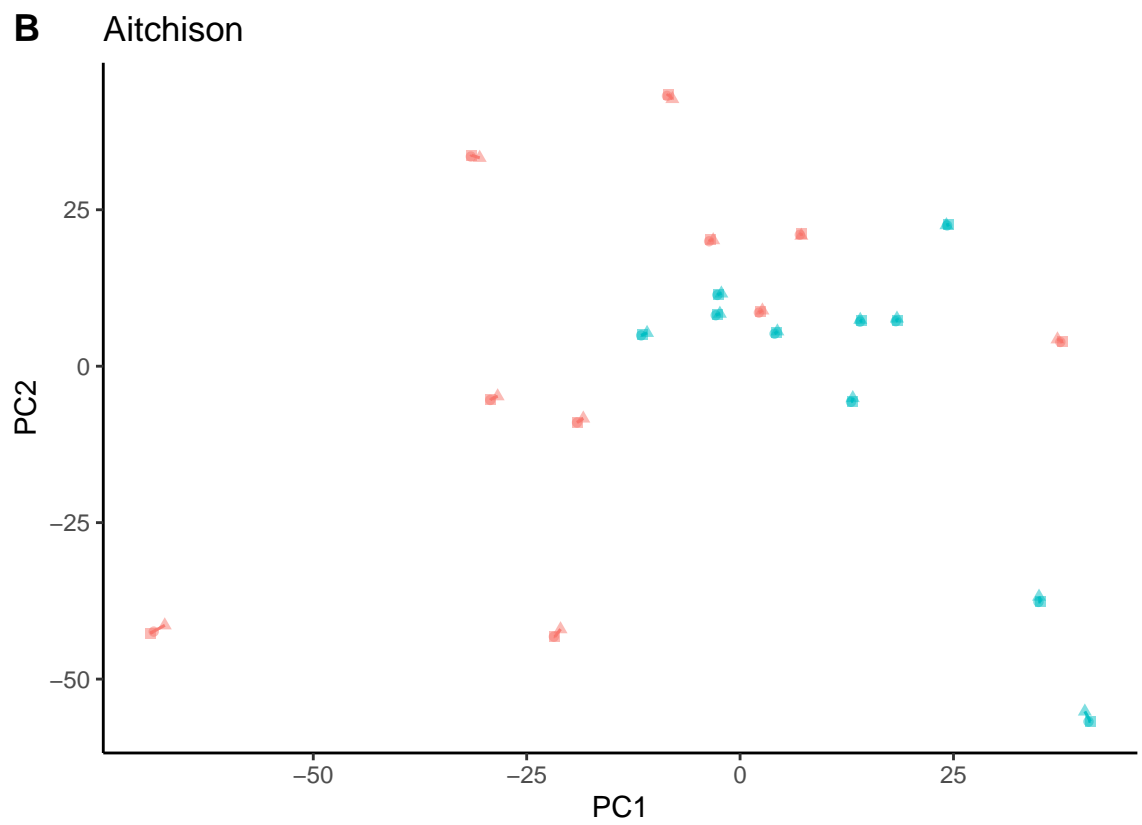

Method ● Corrected abundance ▲ Gene abundance ■ True cell abundance

Environment ● 1 ● 2

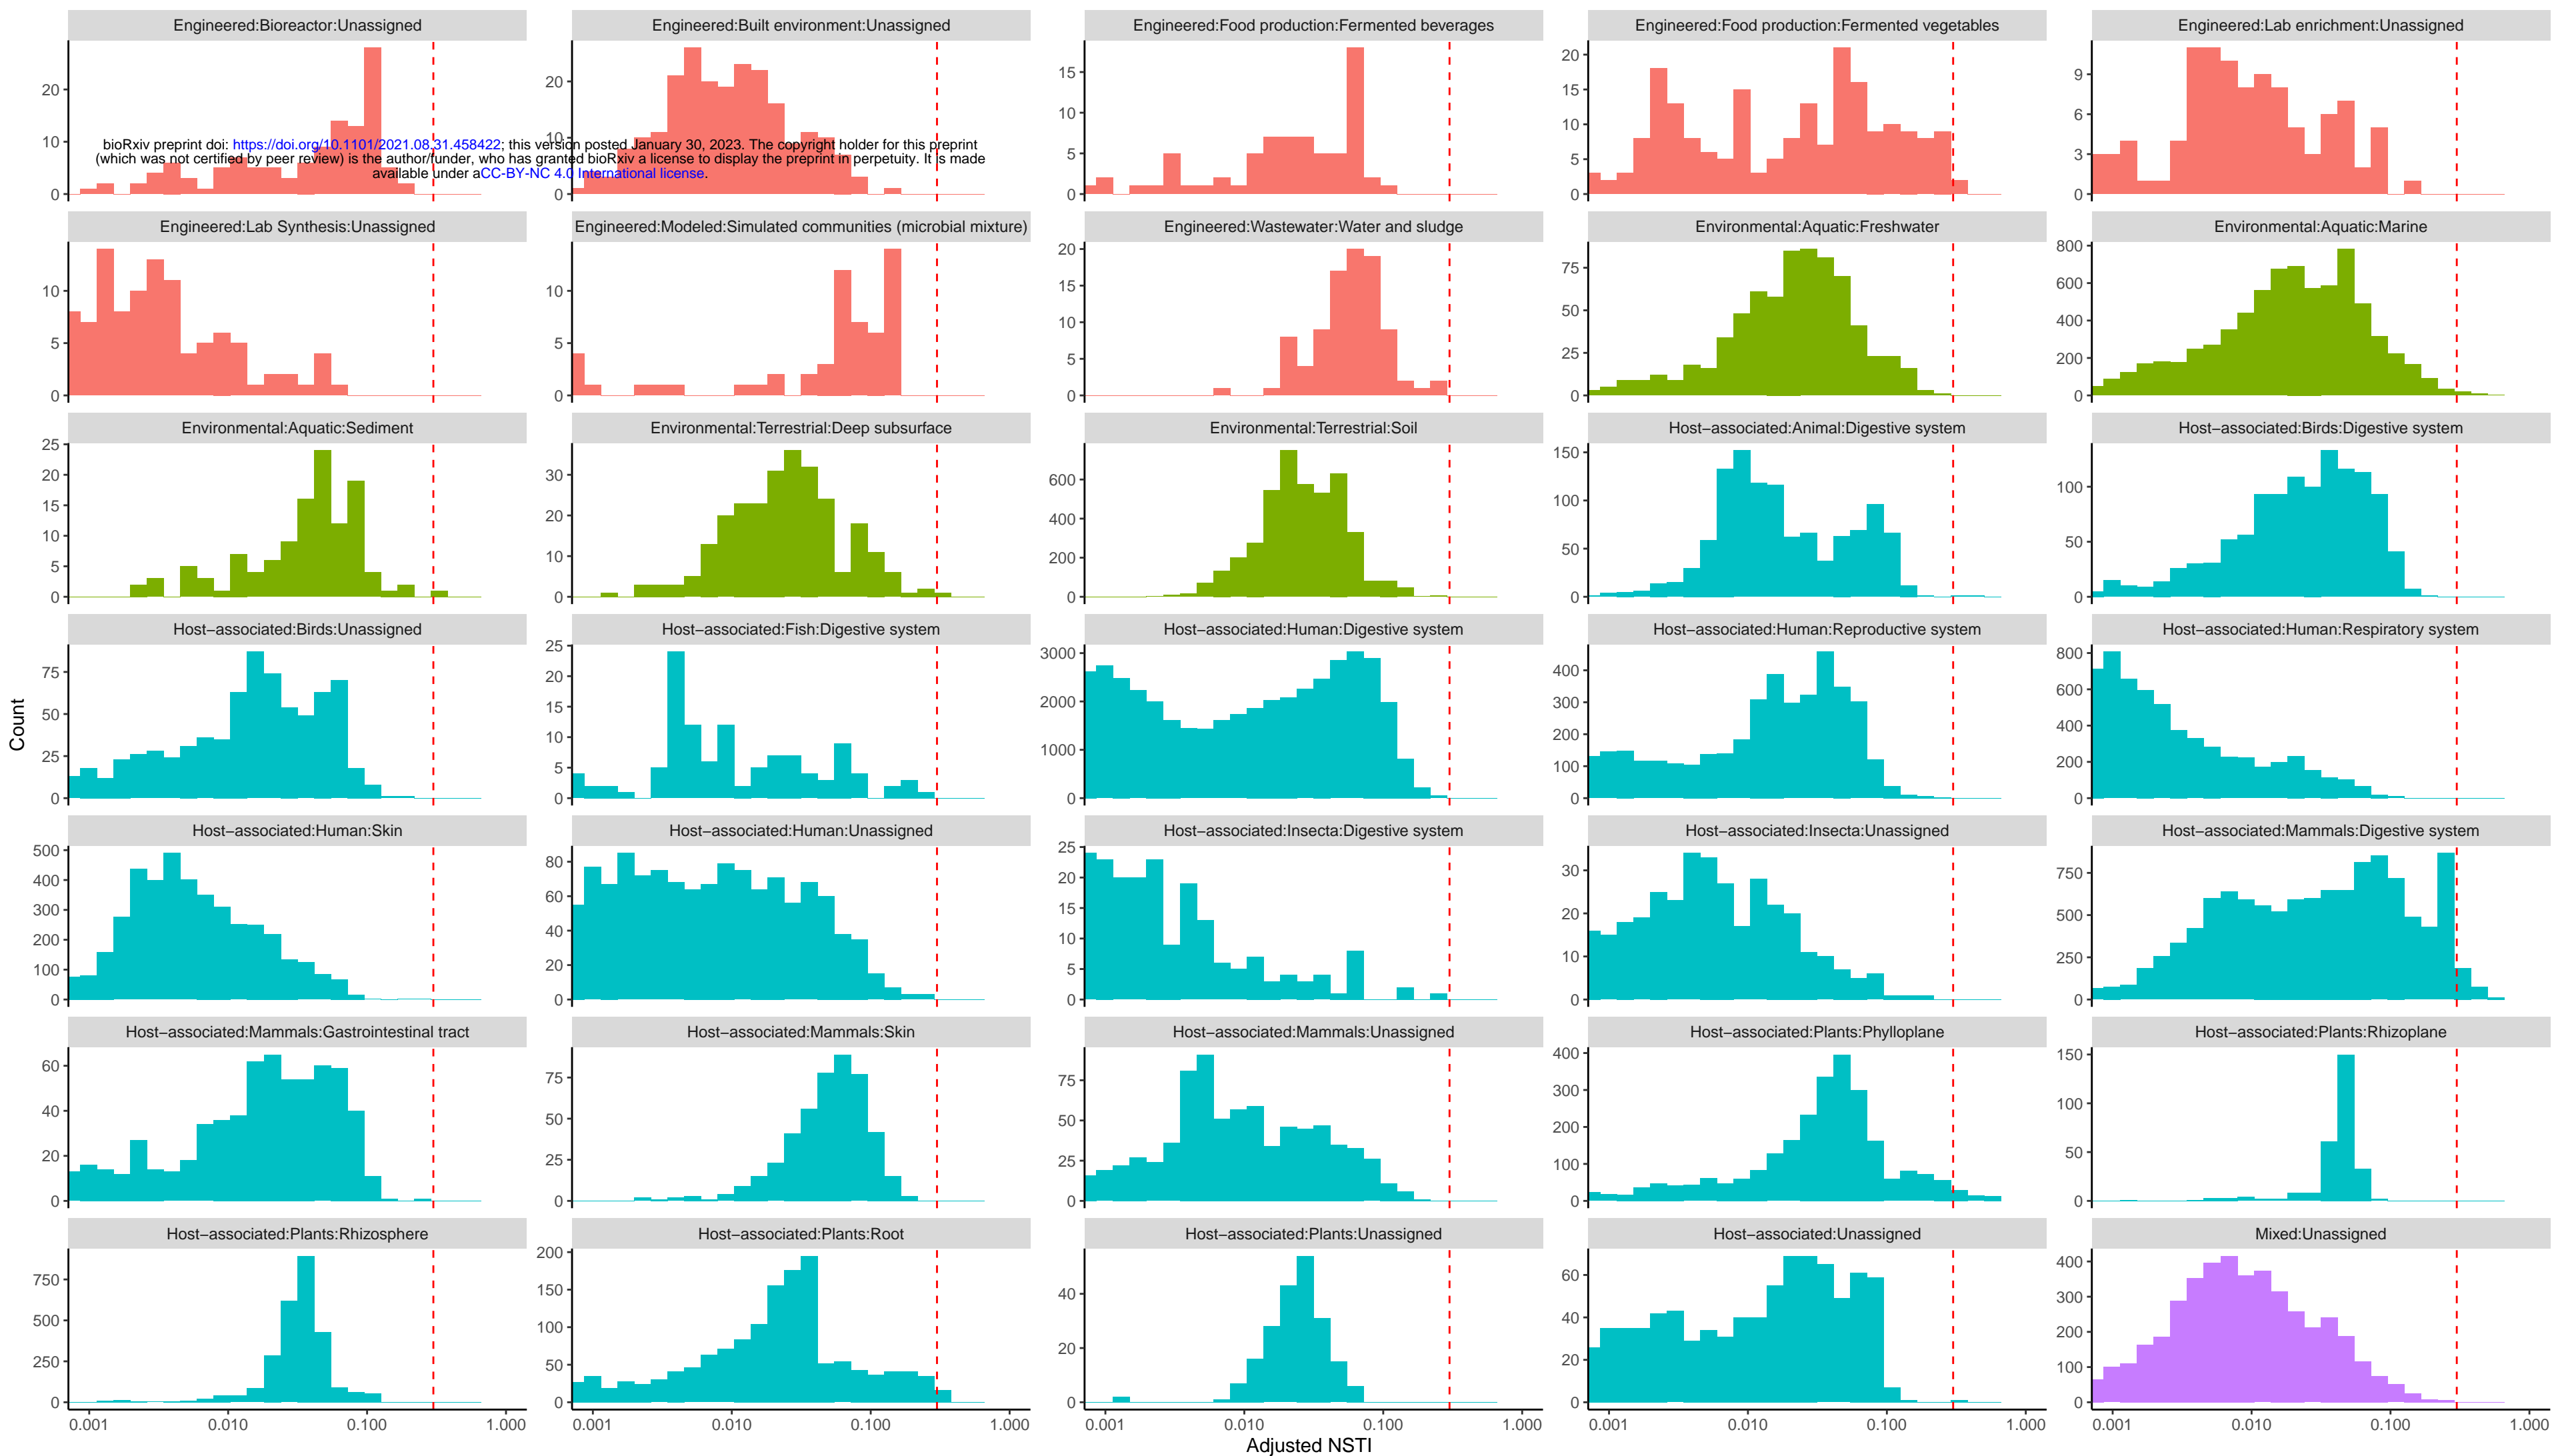

Engineered Environmental Host-associated Mixed
